1 **Overexpression of the vascular brassinosteroid receptor BRL3**  
2 **confers drought resistance without penalizing plant growth**

3  
4 Norma Fàbregas<sup>1,8,\*</sup>, Fidel Lozano-Elena<sup>1,\*</sup>, David Blasco-Escámez<sup>1</sup>, Takayuki  
5 Tohge<sup>2,9</sup>, Cristina Martínez-Andújar<sup>3</sup>, Alfonso Albacete<sup>3</sup>, Sonia Osorio<sup>4</sup>, Mariana  
6 Bustamante<sup>1</sup>, José Luis Riechmann<sup>1,10</sup>, Takahito Nomura<sup>5</sup>, Takao Yokota<sup>6</sup>, Ana  
7 Conesa<sup>7</sup>, Francisco Pérez Alfocea<sup>3</sup>, Alisdair R. Fernie<sup>2</sup> and Ana I. Caño-  
8 Delgado<sup>1,†</sup>

9 <sup>1</sup>*Centre for Research in Agricultural Genomics (CRAG) CSIC-IRTA-UAB-UB,*  
10 *Barcelona 08193, Spain.*

11 <sup>2</sup>*Max Planck Institute of Molecular Plant Physiology, Potsdam-Golm D-14476,*  
12 *Germany.*

13 <sup>3</sup>*Department of Plant Nutrition, CEBAS-CSIC, Murcia 30100, Spain.*

14 <sup>4</sup>*Instituto de Hortofruticultura Subtropical y Mediterránea “La Mayora”.*

15 *University of Málaga-Consejo Superior de Investigaciones Científicas.*

16 *Department of Molecular Biology and Biochemistry, Málaga 29071, Spain.*

17 <sup>5</sup>*Center for Bioscience Research and Education, Utsunomiya University,*

18 *Minemachi, Utsunomiya 321-8505, Japan.*

19 <sup>6</sup>*Department of Biosciences, Teikyo University, Toyosatodai, Utsunomiya 320-*

20 *8551, Japan.*

21 <sup>7</sup>*Microbiology and Cell Science Department, IFAS, Genetics Institute, University*

22 *of Florida, Gainesville 32603, USA.*

23

24 <sup>8</sup>*Current Address: Max Planck Institute of Molecular Plant Physiology,*

25 *Potsdam-Golm D-14476, Germany.*

26 <sup>9</sup>*Current Address: NAIST Graduate school of Biological Sciences, 8916-5*  
27 *Takayama, Ikoma, Nara 630-0192, Japan.*

28 <sup>10</sup>*Institució Catalana de Recerca i Estudis Avançats (ICREA), Barcelona,*  
29 *08010, Spain*

30 \* Both authors contributed equally to this work.

31 <sup>¶</sup>Correspondence to: [ana.cano@cragenomica.es](mailto:ana.cano@cragenomica.es)

32

33

## 34 **ABSTRACT**

35 Drought represents a major threat to food security. Mechanistic data describing  
36 plant responses to drought have been studied extensively and genes conferring  
37 drought resistance have been introduced into crop plants. However, plants with  
38 enhanced drought resistance usually display lower growth, highlighting the need  
39 for strategies to uncouple drought resistance from growth. Here, we show that  
40 overexpression of BRL3, a vascular-enriched member of the brassinosteroid  
41 receptor family, can confer drought stress tolerance in *Arabidopsis*. Whereas  
42 loss-of-function mutations in the ubiquitously expressed BRI1 receptor leads to  
43 drought resistance at the expense of growth, overexpression of BRL3 receptor  
44 confers drought tolerance without penalizing overall growth. Systematic  
45 analyses reveal that upon drought stress, increased BRL3 triggers the  
46 accumulation of osmoprotectant metabolites including proline and sugars.  
47 Transcriptomic analysis suggests that this results from differential expression of  
48 genes in the vascular tissues. Altogether, this data suggests that manipulating  
49 BRL3 expression could be used to engineer drought tolerant crops.

50

51

52

53

## 54 **INTRODUCTION**

55 Drought is responsible for at least 40% of crop losses worldwide and this  
56 proportion is dramatically increasing due to climate change <sup>1</sup>. Understanding  
57 cellular responses to drought stress represents the first step toward the  
58 development of better-adapted crops, something which is a great challenge for  
59 the field of plant biotechnology <sup>2</sup>. Classical approaches aimed at examining how  
60 plants cope with limited water led to the identification of regulators involved in  
61 the signal transduction cascades of the abscisic acid (ABA)-dependent and  
62 ABA-independent pathways <sup>3</sup>. Adaptation to drought stress has been  
63 associated with the presence of proteins that protect cells from dehydration,  
64 such as late-embryogenesis–abundant (LEA) proteins, osmoprotectants and  
65 detoxification enzymes <sup>4,5</sup>. These studies provided deep insights into the  
66 molecular mechanisms underlying abiotic stress <sup>2</sup>, showing that drought  
67 resistance is a complex trait simultaneously controlled by many genes. While  
68 genetic approaches have succeeded in conferring stress resistance to plants,  
69 this generally comes at the cost of reduced growth <sup>6,7</sup>. Therefore, understanding  
70 how cellular growth is coupled to drought stress responses is essential for  
71 engineering plants with improved growth in rain-fed environments.

72 Receptor-like kinases (RLKs) play an important role in optimizing plant  
73 responses to stress <sup>8,9</sup>. Brassinosteroid (BR) hormones directly bind to BRI1  
74 (BR-INSENSITIVE 1) leucine-rich repeat (LRR)-RLK family members on the  
75 plasma membrane <sup>10-14</sup>. Ligand perception triggers BRI1 to interact with the co-

76 receptor BAK1 (BRI1 ASSOCIATED RECEPTOR KINASE 1)<sup>15-17</sup>, which is  
77 essential for early BR signaling events<sup>18</sup>. This BRI1-BAK1 heterodimerization  
78 initiates a signaling cascade of phosphorylation events that control the  
79 expression of multiple BR-regulated genes mainly via the BRI1-EMS-  
80 SUPPRESSOR1 (BES1) and BRASSINAZOLE RESISTANT1 (BZR1)  
81 transcription factors<sup>19-21</sup>.

82 Although BRs modulate multiple developmental and environmental stress  
83 responses in plants, the exact role of BRs under stress conditions remains  
84 controversial. Whereas the exogenous application of BRs and the  
85 overexpression of the BR biosynthetic enzyme DWF4 both confer increased  
86 plant adaptation to drought stress<sup>22-24</sup>, suppression of the BRI1 receptor also  
87 results in drought-resistant phenotypes<sup>25,26</sup>. Intriguingly, ABA signaling inhibits  
88 the BR signaling pathway after BR perception, and crosstalk between the two  
89 pathways upstream of the BIN2 (BRASSINOSTEROID-INSENSITIVE 2) kinase  
90 has been reported<sup>27,28</sup>. Further crosstalk has been described downstream  
91 mediated by the overlapping transcriptional control of multiple BR- and ABA-  
92 regulated genes<sup>29,30</sup> such as *RESPONSE TO DESICCATION 26 (RD26)*<sup>26</sup>.

93 Recently, greater attention is being placed on the spatial regulation of hormonal  
94 signaling pathways in attempt to further understand the coordination of plant  
95 growth and stress responses<sup>26,31-34</sup>. For instance, while the BRI1 receptor is  
96 widely localized in many tissues<sup>35</sup>, the BRI1-LIKE receptor homologues BRL1  
97 and BRL3 signal from the innermost tissues of the plant and thereby contribute  
98 to vascular development<sup>12,33,36</sup>. BR receptor complexes are formed by different  
99 combinations of BRI1-like LRR-RLKs with the BAK1 co-receptor in the plasma  
100 membrane<sup>33</sup>. Despite BRI1 being a central player in plant growth and

101 adaptation to abiotic stress <sup>26,37,38</sup>, the functional relevance of vascular BRL1 and  
102 BRL3 is only just beginning to be explored <sup>33,39</sup>. For example, in previous  
103 proteomic approaches we found abiotic stress-related proteins within BRL3  
104 signalosome complexes <sup>33</sup>, but the exact role of the BRL3 pathway in drought  
105 remains elusive.

106 Here, we show that knocking out or overexpressing different BR receptors  
107 modulate multiple drought stress-related traits in both the roots and shoots.  
108 While the traits controlled by the BRI1 pathway are intimately linked to growth  
109 arrest, we found that overexpressing the vascular-enriched BRL3 receptors can  
110 confer drought resistance without penalizing overall plant growth. Moreover,  
111 metabolite profiling revealed that the overexpression of the BRL3 receptor  
112 triggers the production of an osmoprotectant signature (i.e., proline, trehalose,  
113 sucrose, and raffinose family oligosaccharides) in the plant and the specific  
114 accumulation of the osmoprotectant metabolites in the roots during periods of  
115 drought. Subsequent transcriptomic profiling showed that this metabolite  
116 signature is transcriptionally regulated by the BRL3 pathway in response to  
117 drought. An enrichment of deregulated genes in root vascular tissues,  
118 especially in the phloem, further supports a preferential accumulation of  
119 osmoprotectant metabolites to the root. Overall, this study demonstrates that  
120 overexpression of the BRL3 receptor boosts the accumulation of sugar and  
121 osmoprotectant metabolites in the root and overcomes drought-associated  
122 growth arrest, thereby uncovering a strategy to protect crops against drought.

123

## 124 **RESULTS**

### 125 **BR receptors control osmotic stress sensitivity in the root**

126 To determine the contribution of the BR complexes in the response to drought,  
127 we performed a comprehensive characterization of different combinations of  
128 mutants of all the BR receptors and the BAK1 co-receptor. For each  
129 combination, we first analyzed primary root growth (Fig. 1a). As previously  
130 described<sup>17,33,40</sup>, seven-day-old roots of *bak1*, *brl1brl3bak1*, *bri1*, and  
131 *bri1brl1brl3* displayed shorter roots than the Col-0 wild type (WT). We also  
132 found that the primary roots of the quadruple mutant *bri1brl1brl3bak1* (hereafter  
133 *quad*) were the shortest and the most insensitive to BRs (Fig. 1a,b and  
134 Supplementary Fig. 1). Conversely, plants overexpressing BRL3 (*35S:BRL3-*  
135 *GFP*, hereafter *BRL3ox*) not only exhibited longer roots than WT (Fig. 1a,b) but  
136 also showed increased receptor levels in root vascular tissues<sup>33</sup>  
137 (Supplementary Fig. 2). These results agree with the previously reported role of  
138 BR receptors in promoting root growth<sup>40,41</sup>. We then subjected Arabidopsis  
139 seedlings to osmotic stress by transferring them to sorbitol-containing media  
140 and subsequently quantified the level of inhibition of root growth in sorbitol  
141 relative to control conditions (see Methods). A significantly lower level of relative  
142 root growth inhibition mediated by osmotic stress was observed in *bri1* (27%),  
143 *bri1brl1brl3* (28%) and *quad* (27%) mutants compared to the WT (39%; Fig.  
144 1a,b). In contrast, no differences were found in *brlbrl3* and *brl1brl3bak1* root  
145 growth inhibition when compared to WT (Fig. 1a,b). Similarly, the roots of  
146 *BRL3ox* plants were like those of WT in terms of relative root growth inhibition  
147 (Fig. 1a,b).

148 Previous experimental evidences unveiled that water stress-induced cell death  
149 in Arabidopsis roots is localized and occurs via programmed cell death (PCD)  
150<sup>42</sup>. As shown by the incorporation of propidium iodine (PI) into the nuclei (Fig.

151 1c,d), a short period of osmotic stress (24h) caused cell death in the elongation  
152 zone of WT roots. In comparison, a reduced amount of cell death was observed  
153 in the roots of *bri1*, *bri1brl1brl3* and *quad* mutants (Fig. 1c,d), thereby indicating  
154 less sensitivity towards osmotic stress. Conversely, plants with increased levels  
155 of BRL3 showed a massive amount of cell death in root tips compared to WT,  
156 indicating an increased sensitivity to short osmotic stress (Fig 1c,d). These  
157 results point towards a role for BR receptors in triggering osmotic stress  
158 responses in the plant root.

159 Since root hydrotropism represents a key feature for adaptation to environments  
160 scarce in water <sup>43</sup>, we investigated the capacity of roots to escape imposed  
161 osmotic stress by bending towards water-available media (Fig. 2a). We found  
162 that BR receptor loss-of-function mutants had reduced hydrotropic responses  
163 compared to WT plants. For instance, while no significant differences were  
164 found under control conditions (mock) (Supplementary Fig. 3), the roots of BR  
165 receptor mutants grew straighter than WT roots towards sorbitol-containing  
166 media (Fig. 2a-c). Interestingly, *brl1brl3bak1* mutants were the least sensitive to  
167 osmotic stress in terms of hydrotropism, showing lower root curvature angles  
168 than the *quad* roots (Fig. 2b). Consistently, compared to WT roots, an enhanced  
169 hydrotropic response was observed in *BRL3ox* (Fig. 2a-c). Furthermore,  
170 exogenous application of the BR synthesis inhibitor brassinazole <sup>44</sup> reverted the  
171 hydrotropic response of WT roots (Supplementary Fig. 3). For better  
172 visualization, we generated a drought multi-trait matrix for all the BR receptor  
173 mutants analyzed in this study (Fig. 2d; Supplementary Table 1). From this  
174 matrix, it can be seen that overexpression or mutation of BRL3/BRL1/BAK1  
175 receptors in the vascular tissues alters drought-response related traits.

176

177 ***BRL3ox* confers drought resistance without penalizing growth**

178 To investigate if the impaired responses to abiotic stress observed in root  
179 seedling were preserved in mature plants, we next analyzed the phenotypes of  
180 plants exposed to severe drought. After 12 days of withholding water, dramatic  
181 symptoms of drought stress were observed in WT, *brl1brl3* and *brl1brl3bak1*  
182 mutants. In contrast, other BR mutants showed a remarkable degree of drought  
183 resistance. In particular, *bak1*, *bri1*, *bri1brl1brl3*, and *quad* mutant plants were  
184 the most resistant to the severe water-withholding regime (Fig. 3a). As these  
185 mutants exhibited some degree of dwarfism (Fig. 3a), we confirmed their  
186 resistance to drought by examining their survival rates after re-watering (Fig.  
187 3b). To correct for the delayed growth seen in BR-deficient mutants, plants were  
188 submitted to a time course of drought stress in which water use, photosynthesis  
189 and transpiration parameters were monitored under similar relative soil water  
190 content (Fig. 3c-e). The WT plants took just 9 days to use 70% of the available  
191 water (field capacity) during the drought period (Fig. 3c). In comparison, BR  
192 loss-of-function mutant plants *bri1*, *bri1brl1brl3* and *quad* took 15 days. All  
193 subsequent measurements were done at the same soil water content for each  
194 genotype. We found that the relative water content (RWC) in WT plants was  
195 reduced during drought, while RWC in BR mutant leaves remained as in well-  
196 watered conditions (Fig. 3d). In addition, compared to WT plants, BR mutants  
197 sustained higher levels of photosynthesis and transpiration during the drought  
198 period (Fig. 3e and Supplementary Fig. 4). Altogether our results indicate that  
199 the dwarf BR receptor mutant plants are more resistant while consuming less  
200 water, likely through avoiding the effects of drought (Fig. 3f).



201 Strikingly, we found that *BRL3ox* plants were more resistant than WT plants to  
202 severe drought stress as shown by increased survival rates (Fig. 3a,b). Plants  
203 with increased BRL3 receptors showed reduction of RWC during drought  
204 similarly to WT plants (Fig. 3d). Interestingly the rate of photosynthesis was  
205 lower in *BRL3ox* compared to WT at basal conditions, but together with  
206 transpiration, was more stable than in WT plants during the drought period (Fig.  
207 3,e and Supplementary Fig. 4). This indicates that *BRL3ox* plants are healthier  
208 than WT under the same water consumption conditions. These results suggest  
209 that the BRL3 overexpression actively promotes drought tolerance without  
210 penalizing plant growth (Fig. 3f).

211

### 212 ***BRL3ox* plants accumulate osmoprotectant metabolites**

213 To further investigate the cause behind drought tolerance conferred by BRL3  
214 overexpression, we performed metabolite profiling of *BRL3ox* plants and  
215 compared it to the profile of WT and *quad* plants in a time course drought  
216 experiment. Roots were separated from shoots to address possible changes in  
217 metabolite accumulation from source to sink tissues. The complete metabolic  
218 fingerprints are provided in Supplementary Fig. 5 and 6 and Supplementary  
219 Data 1 and 2. Metabolite profiling of mature *BRL3ox* plants grown in control  
220 conditions (time 0) revealed an increment in the production of osmoprotectant  
221 metabolites. Both shoots (Fig. 4a) and roots (Fig. 4b) of the *BRL3ox* plants  
222 exhibited metabolic signatures enriched in proline and sugars, metabolites  
223 which have previously been reported to confer resistance to drought<sup>45-47</sup>. This  
224 suggests that the BRL3 receptor promotes priming<sup>48</sup>. Importantly, the levels of  
225 these metabolites were lower in *quad* mutant plants (Fig. 4a,c).

226 Compared to WT, sugars including fructose, glucose, galactinol, galactose,  
227 maltose, and raffinose overaccumulated in the shoots of *BRL3ox* (Fig. 4a).  
228 Conversely, whereas glucose levels were lower in the roots, sucrose, trehalose,  
229 *myo*-inositol, and maltose appeared to accumulate here (Fig. 4b) suggesting  
230 that the BRL3 pathway promotes sugar accumulation preferentially in the roots.  
231 We then analyzed the dynamics of each metabolite in response to drought (see  
232 Methods). In this time course, a rapid accumulation of osmoprotectant  
233 metabolites was observed in *BRL3ox* plants (Fig. 4c,d). In the shoots, proline  
234 showed the highest levels respect WT along the entire drought time course (Fig.  
235 4c,f). In contrast, glucose, galactose and *myo*-inositol increased at similar or  
236 slightly lower rates than in the shoots of WT plant (Fig. 4c,e,g). However, in  
237 roots, an accumulation of trehalose, sucrose, proline, and raffinose was  
238 observed in *BRL3ox* mutants subjected to drought stress (Fig. 4d), and this  
239 accumulation showed steeper exponential dynamics than in WT plants (Fig.  
240 4h). Additionally, glucose, galactose, fructose, and *myo*-inositol linearly  
241 increased in WT roots but exponentially increased in *BRL3ox* roots (Fig. 4j).  
242 Interestingly, throughout this time course, the levels of these metabolites were  
243 lower in the *quad* mutant plants compared to in WT (Supplementary Fig. 7).  
244 Altogether, these findings uncover a key role for BR receptors in promoting  
245 sugar metabolism, and support the idea that BRL3 triggers the accumulation of  
246 osmoprotectant metabolites in the root to promote growth during periods of  
247 drought.

248

249 **Transcriptional control of metabolite production in *BRL3ox***

250 We next investigated whether metabolic pathways are transcriptionally  
251 regulated in *BRL3ox* roots. RNAseq of *BRL3ox* roots revealed 759 deregulated  
252 genes at basal conditions (214 upregulated and 545 downregulated; FC>1.5,  
253 FDR<0.05; Supplementary Data 3) and 1,068 deregulated genes in drought  
254 conditions (378 upregulated and 690 downregulated; FC>1.5, FDR<0.05;  
255 Supplementary Data 4). In control conditions, a high proportion of the  
256 deregulated genes belonged to the response to water stress, oxygen-containing  
257 compounds (ROS) and response to ABA GO categories (Fig. 5a, 5c,  
258 Supplementary Data 5 and 6). We next deployed the genes falling into the  
259 response to stress category, which included classical drought stress markers  
260 such as *RD22* and *RAB18* that were already upregulated in basal conditions  
261 (Fig 5b). An enrichment of genes belonging to the response to hormone  
262 category indicated altered hormonal responses in *BRL3ox* plants under drought  
263 (Fig 5a,c and Supplementary Data 7 and Supplementary Data 8). Further  
264 analyses of specific hormonal responses revealed that the ABA and jasmonic  
265 acid (JA) were the most altered responses (Supplementary Fig. 8). Repression  
266 of JA biosynthesis genes may be responsible for decreased levels of JA in  
267 basal conditions (Supplementary Fig. 8).

268 In order to uncover differential drought responses between WT and *BRL3ox*  
269 roots, we constructed a linear model accounting for the interaction between  
270 genotype and drought (Supplementary Data 9). Taking the 200 most  
271 significantly affected genes, we grouped them in (i) genes more activated in  
272 *BRL3ox* under drought compared to WT (Supplementary Data 10) and (ii)  
273 genes more repressed in *BRL3ox* under drought compared to WT  
274 (Supplementary Data 11). GO enrichment analysis of this genotype-drought

275 interaction revealed (i) secondary metabolism, response to stress and response  
276 to water deprivation in the first group and (ii) brassinosteroid mediated signaling  
277 pathway in the second group (Fig. 5d). Importantly, the expression levels of  
278 dehydration response genes remained repressed in *quad* mutant plants during  
279 drought (Supplementary Fig. 7 and Supplementary Data 12-15). The  
280 expression levels of two key BR biosynthesis genes, *CPD* and *DWF4* were  
281 analyzed by RT qPCR. Consistently, within the drought time course,  
282 transcription levels of *CPD* and *DWF4* were increased in *quad* and reduced in  
283 *BRL3ox* compared to WT plants. Quantification of the bioactive BR hormone  
284 Castasterone (CS) showed similar trends and we could only detect BL in *quad*,  
285 suggesting that BL is accumulated in *quad* more than in WT and *BRL3ox* plants  
286 (Supplementary Fig. 9).

287 Analysis of transcription factors revealed 29 of them with differential responses  
288 to drought between *BRL3ox* and WT roots. Interestingly, the drought-responsive  
289 transcription factor *RD26* showed an enhanced response in *BRL3ox* roots  
290 during stress, whereas several vascular-specific transcription factors remained  
291 repressed under drought (Supplementary Fig. 10). Given that the BRL3  
292 receptor is natively expressed at the phloem-pole pericycle and enriched in  
293 vascular tissues when overexpressed <sup>33</sup>, we analyzed the spatial distribution of  
294 the deregulated genes within the root tissues in our RNAseq dataset <sup>49</sup>. The  
295 deregulated genes were enriched for genes that are preferentially expressed in  
296 specific vascular tissues such as the pericycle and phloem pole pericycle but  
297 also in lateral root primordia (which initiates from pericycle) and root hair cells  
298 (Fig. 6a, see Methods). Interaction-affected genes were enriched in pericycle  
299 and phloem but also in columella and cortex expressed genes (Fig. 6b). Among

300 the phloem-enriched genes, we found two trehalose phosphatases (*TPPs*) and  
301 one galactinol synthases (*Go/S2*) that show increased expression in *BRL3ox*  
302 roots at basal conditions and in response to drought (Fig. 6d). These enzymes  
303 are involved in the synthesis of the osmoprotectant metabolites — trehalose,  
304 myo-inositol and raffinose — that overaccumulated in *BRL3ox* roots. Together,  
305 these results suggest the importance of changes in expression of phloem-  
306 associated genes for sustaining drought resistance.

307 Furthermore, a statistical analysis revealed a significant link between the whole  
308 transcriptomic and metabolomic signatures, both in basal conditions and under  
309 drought ( $p=0.017$  and  $p=0.001$  respectively; see Methods), suggesting that the  
310 metabolic signature of *BRL3ox* plants is transcriptionally controlled. We used  
311 the metabolic and transcriptomic signatures to identify deregulated metabolic  
312 pathways using Paintomics<sup>50</sup>. This analysis suggests constitutive deregulation  
313 of sucrose metabolism in *BRL3ox* plants that was enhanced during drought  
314 stress. We also found that BRL3 overexpression affects galactose metabolism  
315 under periods of drought, including the raffinose family of oligosaccharides  
316 (RFOs) synthesis pathway (Supplementary Fig. 11, Supplementary Data 16 and  
317 17). Collectively, these results suggest that BRL3 overexpression promotes  
318 drought tolerance, mainly by controlling sugar metabolism.

319

## 320 **DISCUSSION**

321 Our study shows that overexpression of the BRL3 receptor can prevent growth  
322 arrest during drought. We suggest that this is accomplished through the  
323 transcriptional control of metabolic pathways that produce osmoprotectant  
324 metabolites that accumulate in the roots. While spatial BR signaling has been

325 shown to contribute to stem cell replenishment in response to genotoxic stress  
326 <sup>31,34</sup>, here we show that ectopic expression of vascular-enriched BRL3  
327 receptors can promote growth during drought. Altogether, our results suggest  
328 that spatial regulation of BR signaling can affect plant stress responses.

329 The exogenous application of BR compounds has been used widely in  
330 agriculture to extend growth under different abiotic stresses <sup>22,51</sup>, yet how these  
331 molecules precisely activate growth in challenging conditions remains largely  
332 unknown. The analysis of BR signaling and BR synthesis mutant plants  
333 subjected to stress failed to provide a linear picture of the involvement of BR in  
334 drought stress adaptation. For instance, although overexpression of the  
335 canonical BRI1 pathway and the BR biosynthesis gene DWF4 can both confer  
336 abiotic stress resistance <sup>24,38</sup>, *BRI1* loss-of-function mutants also showed  
337 drought stress resistance <sup>25,26</sup>. However, increased levels of BR-regulated  
338 transcription factors trigger antagonistic effects in drought stress responses <sup>26,52</sup>,  
339 thus depicting a complex scenario for the role of BRs in abiotic stress. Given the  
340 spatiotemporal regulation of the BR signaling components <sup>39</sup> and the complexity  
341 of drought traits <sup>7</sup>, it is plausible to hypothesize that drought traits are under the  
342 control of cell type-specific BR signaling.

343 Our study unveils that the BR family of receptors, in addition to promoting  
344 growth, guides phenotypic adaptation to drought by influencing a myriad of  
345 drought stress related traits. The drought resistance phenotypes of BR loss-of-  
346 function mutants (Fig. 3a) are likely caused by a reduced exposure of these  
347 plants to the effect of drought. This phenomenon, known as drought avoidance,  
348 is linked to growth arrest and stress insensitivity that maintains transpiration,  
349 leaf water status and photosynthesis along the drought (Fig. 3 and

350 Supplementary Fig. 4). The reduced levels of ABA and canonical stress-related  
351 metabolites, together with the downregulation of stress-related genes, further  
352 support the insensitivity of *quad* plants to stress (Supplementary Figs. 7 and 8).  
353 In contrast, the phenotypes observed in *BRL3ox* plants indicate an active  
354 drought-tolerance mechanism driven by overexpression of the BRL3 receptor.  
355 First, *BRL3ox* roots showed increased water stress-induced PCD in the root tip  
356 compared to WT (Fig. 1c,d), which has been proposed to modify the root  
357 system architecture and thereby enhance drought tolerance <sup>49</sup>. Second, the  
358 enhanced hydrotropic response of *BRL3ox* roots (Fig. 2a-c) could function  
359 during water-limited conditions by modifying root architecture for increased  
360 acquisition of water, favoring plant growth and survival under drought conditions  
361 as previously described <sup>53</sup>. Third, at same RWC in leaves, the rate of  
362 photosynthesis and transpiration were more stable in *BRL3ox* than in WT plants  
363 during drought (Fig. 3d,e and Supplementary Fig. 4). Altogether, these findings  
364 indicate that BRL3 overexpression actively promotes drought tolerance without  
365 penalizing plant growth.

366 We found the expression of the drought-response transcription factor *RD26* to  
367 be enhanced in *BRL3ox* roots when subjected to drought (Supplementary Fig.  
368 10). *RD26* has been shown to antagonize the BR canonical transcription factor  
369 BES1 <sup>26</sup>, thereby suggesting that BRL3 overexpression activates alternative  
370 pathways. These alternative pathways may be derived from a spatial  
371 specialization of BR functions within the root. Indeed, we found that genes  
372 preferentially expressed in vascular tissues, especially within phloem-related  
373 cell types, were overrepresented among deregulated genes in *BRL3ox* roots  
374 (Fig. 6a,b). The localization of the native BRL3 protein in phloem cells <sup>33</sup> and the

375 metabolic signature found in *BRL3ox* suggests a possible role in phloem  
376 loading during drought. Moreover, metabolic enzymes implicated in trehalose  
377 and RFO metabolism were enriched in vascular tissues and either upregulated  
378 in *BRL3ox* roots in basal conditions or strongly responding to drought (Fig.  
379 6c,d). Thus, BRL3 overexpression may affect not only loading and unloading of  
380 the phloem, but may also directly control metabolic pathways. This is the case  
381 for the trehalose phosphate phosphatase family (*TPPs*)<sup>54,55</sup> and galactinol  
382 synthase 2 (*GoIS2*)<sup>56</sup>, which are both described to impact drought responses  
383 and are involved in trehalose and RFO synthesis respectively. In addition to  
384 controlling expression in vascular tissues, our analyses also suggest that BRL3  
385 overexpression regulates non-vascular enzymes important for metabolism and  
386 drought responses. These enzymes include hexokinases such as *HXK3* or  
387 *HKL1*, the sucrose synthases *SUS3* and *SPS2F*, and proline dehydrogenase  
388 genes such as the early response to dehydration 5 (*ERD5*) which is involved in  
389 stress tolerance<sup>57</sup>. In light of our findings and given that *Bes1-D* gain-of-function  
390 mutants exhibit drought hypersensitivity<sup>26</sup>, we propose that overexpression of  
391 the vascular BRL3 receptors may act independently of the canonical growth-  
392 promoting BRI1 pathway.

393 Our data further suggest that *BRL3ox* plants accumulate sugars in the sink  
394 tissues to enable plant roots to grow and escape drought by searching for water  
395 within the soil. In support of these findings, we also observed reduced levels of  
396 photosynthesis in well-watered leaves of *BRL3ox* plants (Fig. 3e). These  
397 results, together with the higher levels of sucrose in roots compared with in  
398 shoots (Fig. 4a) and higher levels of glucose and fructose in the shoots suggest  
399 that the BRL3 pathway promotes sugar mobilization from the leaves (source) to



400 the roots (sink). In fact, previous work reported that BRs promote the flow of  
401 assimilates in crops from source to sink via the vasculature<sup>58</sup> and via sucrose  
402 phloem unloading<sup>59</sup>.

403 In control conditions, *BRL3ox* plants exhibited a metabolic signature enriched in  
404 proline and sugars. Proline and sugar accumulation classically correlates with  
405 drought stress tolerance, osmolytes, ROS scavengers, and chaperone functions  
406<sup>5,45-47,60,61</sup>, suggesting that overexpression of the BRL3 receptor promotes  
407 priming<sup>48,62</sup>. In addition, *BRL3ox* plants also accumulated succinate, fumarate  
408 and malate. Importantly, all these metabolites were decreased in *quad* mutant  
409 plants. Altogether, these data suggest a role for BRL3 signaling in the  
410 promotion of the tricarboxylic acid (TCA) cycle, sugar and amino acid  
411 metabolism.

412 In drought stress conditions, *BRL3ox* shoots displayed increased levels of the  
413 amino acids proline, GABA and tyrosine. In contrast, trehalose, sucrose, *myo*-  
414 inositol, raffinose, and proline were the most abundant metabolites in the  
415 *BRL3ox* roots along the stress time course. Importantly, all these metabolites  
416 have previously been linked to drought resistance<sup>45,46,60</sup>. In addition, the levels  
417 of the RFO metabolites raffinose and *myo*-inositol, which are involved in  
418 membrane protection and radical scavenging<sup>63</sup>, were higher in the roots of  
419 *BRL3ox* plants under drought, yet reduced in the roots of *quad* plants.

420 Our data suggest that the roots of *BRL3ox* plants are loaded with  
421 osmoprotectant metabolites and are thus better prepared to alleviate drought  
422 stress via a phenomenon previously referred to as priming<sup>48,62</sup>. Altogether these  
423 data suggest that drought stress responses are correlated with BRL3 receptor  
424 levels in the root vasculature, especially within the phloem, and that this is

425 important for the greater survival rates of *BRL3ox* plants. Future cell type-  
426 specific engineering of signaling cascades stands out as a promising strategy to  
427 circumvent growth arrest caused by drought stress.

428

## 429 **METHODS**

### 430 **Plant materials**

431 Seeds were sterilized with 35% NaClO for 5 min and washed five times for 5min  
432 with sterile dH<sub>2</sub>O. Sterile seeds were vernalized 48 h at 4°C and grown in half-  
433 strength agar Murashige and Skoog (MS1/2) media with vitamins and without  
434 sucrose. Plates were grown vertically in long day (LD) conditions (16 h of light /  
435 8 h of dark; 22°C, 60% relative humidity). Genotypes used in this study:  
436 Columbia-0 WT (Col-0 WT), *brl1-1brl3-1* (*brl1brl3*), *bak1-3* (*bak1*), *bri1-301*  
437 (*bri1*), *bri1-301brl1-1brl3-1* (*bri1brl1brl3*), *bri1-301bak1-3brl1-1brl3-1* (*quad*) and  
438 *35S:BRL3-GFP* (*BRL3ox*)<sup>33</sup>. DNA rapid extraction protocol<sup>64</sup> was used for all  
439 the plant genotyping experiments. Supplementary Table 2 describes the  
440 primers used for genotyping of the BR mutant plants.

441

### 442 **Brassinolide and sorbitol sensitivity assays in roots**

443 For hormone treatments, seeds were continuously grown in concentration  
444 series of brassinolide (BL,Wako, Japan). For sorbitol assays, three-day-old  
445 seedlings were transferred to either control or 270 mM sorbitol media for four  
446 additional days. The root length of seven-day-old seedlings was measured  
447 using Image J (<http://rsb.info.nih.gov/ij/>) and compared with automatically  
448 acquired data from the MyROOT<sup>65</sup> software (Supplementary Fig. 12). Four-day-  
449 old roots grown in control conditions or in 24 h of sorbitol were stained with

450 propidium iodide (10 ug/ml, PI, Sigma). PI stains the cell wall (control) and DNA  
451 in the nuclei upon cell death (sorbitol). Images were acquired with a confocal  
452 microscope (FV1000 Olympus). Cell death damage in primary roots was  
453 measured in a window of 500  $\mu$ m from QC in the middle root longitudinal  
454 section (Image J). As an arbitrary setting to measure the stained area, a color  
455 threshold ranging from 160 to 255 in brightness was selected.

456

### 457 **Root hydrotropism**

458 Seedlings were germinated in MS1/2 without sucrose for six days. Then, the  
459 lower part of the agar was removed from the plates and MS1/2 with 270 mM  
460 sorbitol was added to simulate a situation of reduced water availability. The  
461 media was placed in 45-degree angle to scape gravitropism effect. When  
462 indicated, 1  $\mu$ M of brassinazole<sup>44</sup> was added to sorbitol media. Root curvature  
463 angles were measured and analyzed using the Image J software  
464 (<http://rsb.info.nih.gov/ij/>).

465

### 466 **Drought stress for scoring plant survival**

467 One-week-old seedlings grown in MS1/2 agar plates were transferred  
468 individually to pots containing 30 $\pm$ 1 g of substrate (plus 1:8 v/v vermiculite and  
469 1:8 v/v perlite). For each biological replicate, 40 plants of each genotype were  
470 grown in LD conditions for three weeks. Three-week-old plants were subjected  
471 to severe drought stress by withholding water for 12 days followed by re-  
472 watering. After the seven-day recovery period, the surviving plants were  
473 photographed and manually counted (two-sided chi-squared test, p-value  
474 <0.01).

475

476 **Metabolite profiling analyses**

477 One-week-old seedlings were placed in individual pots with 30 g of autoclaved  
478 soil and grown under LD photoperiodic conditions. After three weeks growing,  
479 half of the plants were subjected to severe drought (withholding water) for six  
480 days and the other half were watered normally (well-watered control conditions).  
481 A total of five biological replicates were collected every 24 h during the time  
482 course (from day 0 to day 6) both in drought and watered conditions and for  
483 each genotype (WT, *quad* and *BRL3ox*). Four independent plants were bulked  
484 in each biological replicate. Roots were manually separated from shoots. Four  
485 entire shoots were grinded using the Frosty Cryogenic grinder system  
486 (Labman). Four entire root samples were grinded in the Tissue Lyser Mixer-Mill  
487 (Qiagen). Roots were aliquoted into 20 mg samples and shoot into 50 mg  
488 samples (the exact weight was annotated for data normalization). Primary  
489 metabolite extraction was carried as follows<sup>66</sup>. One Zirconia and 500 µl of 100%  
490 Methanol premixed with Ribitol (20:1) were added and samples were  
491 subsequently homogenized in the Tissue Lyser (Qiagen) 3 min at 25 Hz.  
492 Samples were centrifuged 10 min at 14000 rpm (10 °C) and resulting  
493 supernatant was transferred into fresh tubes. Addition of 200 µl of CHCl<sub>3</sub> and  
494 vortex ensuring one single phase followed by the addition of 600 µl of H<sub>2</sub>O and  
495 vortex 15 sec. Samples were centrifuged 10 min at 14000 rpm (10 °C). 100 µl  
496 from the upper phase (polar phase) were transferred into fresh eppendorf tubes  
497 (1.5 ml) and dried in the speed vacuum for at least 3 h without heating. 40 µl of  
498 derivatization agent (methoxyaminhydrochloride in pyridine) were added to  
499 each sample (20 mg/ml). Samples were shaken during 3 h at 900 rpm at 37 °C.

500 Drops on the cover were shortly spun down. One sample vial with 1 mL MSTFA  
501 + 20  $\mu$ l FAME mix was prepared. Addition of 70  $\mu$ l MSTFA + FAMEs in each  
502 sample was done followed by shaking 30 min at 37 °C. Drops on the cover were  
503 shortly spun down.

504 Samples were transferred into glass vials specific for injection in GC-TOF-MS.  
505 The GC-TOF-MS system comprised of a CTC CombiPAL autosampler, an  
506 Agilent 6890N gas chromatograph, and a LECO Pegasus III TOF-MS running in  
507 EI+ mode. Metabolites were identified by comparing to database entries of  
508 authentic standards <sup>67</sup>. Chromatograms were evaluated using Chroma TOF 1.0  
509 (Leco) Pegasus software was used for peak identification and correction of RT.  
510 Mass spectra were evaluated using the TagFinder 4.0 software <sup>68</sup> for metabolite  
511 annotation and quantification (peak area measurements). The resulting data  
512 matrix was normalized using an internal standard, Ribitol, in 100% methanol  
513 (20:1), followed by normalization with the fresh weight of each sample.  
514 Metabolomics data from control (well-watered) conditions at day 0 were  
515 analyzed with a two-tailed t-test, p-value<0.05 (no multiple testing correction).  
516 Data from the time course was analyzed with R software using the maSigPro  
517 package <sup>69</sup>. Briefly, the profile of each metabolite under each condition was  
518 fitted to a polynomial model of maximum degree 3. The curves of each  
519 genotype were statistically compared taking into account the fitting value and  
520 correcting the p-value (Benjamini-Hochberg method). Significant metabolites (p-  
521 value < 0.05) having a differential profile between genotypes were plotted to  
522 visualize their behavior under the drought time course. Clustering analysis was  
523 performed using the maSigPro package and the *hclust* R core function.

524

## 525 **Transcriptomic profiling analysis**

526 For microarray analysis, a drought stress time course was carried out in WT  
527 and *quad* mutant three-week-old plants. Entire plants grown under drought  
528 stress and control conditions were collected every 48 h during the time course  
529 (Day 0, Day 2 and Day 4). Two biological replicates composed of five  
530 independent rosettes were collected. RNA was extracted with the Plant Easy  
531 Mini Kit (Qiagen) and quality checked using the Bioanalyser. A Genome-Wide  
532 Microarray platform (Dual color, Agilent) was performed by swapping the color  
533 hybridization of each biological replicate (Cy3 and Cy5). Statistical analysis was  
534 performed with the package “limma”<sup>70</sup>, and the “mle2/“normexp” background  
535 correction method was used. Different microarrays were quantile-normalized  
536 and a Bayes test used to identify differentially expressed probes. The results  
537 were filtered for adjusted p-value<0.05 (after Benjamini-Hochberg correction)  
538 and Log2 FC >|1.5|. For RNAseq analysis, three-week-old roots were detached  
539 from mature plants grown in soil under control conditions and five days of  
540 drought. RNA was extracted as described above. Stranded cDNA libraries were  
541 prepared with TruSeq Stranded mRNA kit (Illumina). Single-end sequencing,  
542 with 50-bp reads, was performed in an Illumina HiSeq500 sequencer, at a  
543 minimum sequencing depth of 21 M. Reads were trimmed 5 bp at their 3' end,  
544 quality filtered and then mapped against the TAIR10 genome with “HISAT2”.  
545 Mapped reads were quantified at the gene level with “HtSeq”. For differential  
546 expression, samples were TMM normalized and statistical values calculated  
547 with the “EdgeR” package in R. Results were filtered for adjusted p-value (FDR)  
548 <0.05 and FC >|2| in the pairwise comparisons. For the evaluation of differential  
549 drought response between WT and *BRL3ox* roots, a lineal model accounting for

550 the interaction genotype and drought was constructed with “EdgeR” package.  
551 The interaction term was evaluated. A gene was considered to be affected by  
552 the interaction if p-value (uncorrected) < 0.0025. Heatmaps were performed in  
553 R with the heatmap.2 function implemented in the “gplots” package.  
554 For the Rt qPCR, cDNA was obtained from RNA samples by using the  
555 Transcriptor First Strand cDNA Synthesis Kit (Roche) with oligo dT primers.  
556 qPCR amplifications were performed from 10ng of cDNA using LightCycler 480  
557 SYBR Green I master mix (Roche) in 96-well plates according the manufacturer  
558 recommendations. The Real Time PCR was performed on a LightCycler 480  
559 System (Roche). Ubiquitin (AT5G56150) was used as housekeeping gene for  
560 relativizing expression. Primers used are described in Supplementary Table 3.

561

#### 562 **Statistical methods and omics data integration.**

563 For root tissue enrichment analysis, deregulated genes were queried against  
564 available lists of tissue-enriched genes <sup>49</sup>. For each tissue, a 2x2 contingency  
565 table was constructed, counting the number of deregulated genes in the tissue  
566 that were enriched and non-enriched and also the number of non-deregulated  
567 genes (for either FDR>0.05 or logFC >/< in the RNAseq gene universe) that  
568 were enriched and non-enriched. Statistical values of the enrichment were  
569 obtained using a one-sided Fisher’s test. To statistically evaluate the influence  
570 of transcriptomic changes on the metabolic signature, both deregulated  
571 enzymes and metabolites were queried in an annotation file of the metabolic  
572 reactions of *Arabidopsis thaliana*, which included merged data from the KEGG  
573 (<http://www.genome.jp/kegg/>) and BRENDA ([www.brenda-enzymes.org](http://www.brenda-enzymes.org))  
574 databases. Then, the same approach of constructing a 2x2 contingency table

575 was taken. Significant and non-significant metabolites annotated in the  
576 database were matched with differentially and non-differentially expressed  
577 genes annotated in the database. The statistical value of the association  
578 between regulated metabolites and genes was obtained through a two-sided  
579 Fisher's exact test. Genes and metabolites were mapped onto the KEGG  
580 pathways using the PaintOmics3 (<http://bioinfo.cipf.es/paintomics/>) according  
581 the developer's instructions<sup>50</sup>.

582

### 583 **Physiological parameters and chlorophyll fluorescence**

584 One-week-old seedlings were placed in individual pots and watered with the  
585 same volume of a modified Hoagland solution (one-fifth strength). Pots were  
586 weighed daily during the experiment. Well-watered control plants were grown in  
587 100% field capacity (0% of water loss). The time course drought stress assay  
588 was started by withholding the nutrient solution until reaching 25, 50, 60 and  
589 70% water loss. Photosynthesis (*A*) and transpiration (*E*) were measured in  
590 control and drought plants at those time points. Four plants of each genotype  
591 were harvested at 0, 50 and 70% water loss for biomass, water content and  
592 hormone analyses. Drought experiments were repeated three times and at least  
593 four plants per genotype and treatment were used in each experiment. RWC  
594 was calculated according to the formula:  $RWC (\%) = [(FW-DW) / (TW-DW)] \times$   
595 100.

596

### 597 **Plant hormones quantification**

598 Plant hormones cytokinins (*trans*-zeatin), gibberellins (GA1, GA4 and GA3),  
599 indole-3-acetic acid (IAA), abscisic acid (ABA), salicylic acid (SA), jasmonic acid



600 (JA), and the ethylene precursor 1-aminocyclopropane-1-carboxylic acid (ACC)  
601 were analyzed as follows. 10  $\mu$ l of extracted sample were injected in a UHPLC–  
602 MS system consisting of an Accela Series U-HPLC (ThermoFisher Scientific,  
603 Waltham, MA, USA) coupled to an Exactive mass spectrometer (ThermoFisher  
604 Scientific, Waltham, MA, USA) using a heated electrospray ionization (HESI)  
605 interface. Mass spectra were obtained using the Xcalibur software version 2.2  
606 (ThermoFisher Scientific, Waltham, MA, USA). For quantification, calibration  
607 curves were constructed for each analyzed hormone (1, 10, 50, and 100  $\mu$ g l<sup>-1</sup>)  
608 and corrected for 10  $\mu$ g l<sup>-1</sup> deuterated internal standards. Recovery  
609 percentages ranged between 92 and 95%.

610 For endogenous BR analysis plant materials (4 g fresh weight) were lyophilized  
611 and grinded. BL and CS were extracted with methanol and purified by solvent  
612 partitions by using a silica gel column and ODS-HPLC as follows. The  
613 endogenous levels of BL and CS were quantified by LC-MS/MS using their  
614 deuterated internal standards (2ng).

615 LC-MS/MS analysis was performed with a triple quadrupole/linear ion trap  
616 instrument (QTRAP5500; AB Sciex, USA) with an electrospray source. Ion  
617 source was maintained at 300  $\mu$ C. Ion spray voltage was set at 4500 V in  
618 positive ion mode. MRM analysis were performed at the transitions of m/z 487  
619 to 433 (Collision Energy, CE 30 V) and 487 to 451 (CE 21 V) for 2 H 6 -BL, m/z  
620 481 to 427 (CE 30 V) and 481 to 445 (CE 30 V) for BL, m/z 471 to 435 (CE 23  
621 V) and 471 to 453 (CE 25 V) for 2 H 6 -CS and m/z 465 to 429 (CE 23 V) and  
622 465 to 447 (CE 25 V) for CS. Enhanced product ion scan was carried out at CE  
623 21 V. HPLC separation was performed using a UHPLC (Nexera X2; Shimadzu,  
624 Japan) equipped with an ODS column (Kinetex C18, f2.1  $\times$  150 mm, 1.7  $\mu$ m;

625 Phenomenex, USA). The column oven temperature was maintained at 30°C.  
626 The mobile phase consisted of acetonitrile (solvent A) and water (solvent B),  
627 both of which contained 0.1% (v/v) acetic acid. HPLC separation was conducted  
628 with the following gradient at flow rate of 0.2 mL·min<sup>-1</sup>: 0 to 12 min, 20% A to  
629 80% A; 12 to 13 min, 80% A to 100% A; 13 to 16 min, 100% A.

630

### 631 **DATA AVAILABILITY**

632 RNAseq and microarray data that support the findings of this study have been  
633 deposited in Gene Expression Omnibus (GEO) with the GSE119382  
634 [<https://www.ncbi.nlm.nih.gov/geo/query/acc.cgi?acc=GSE119382>] and  
635 GSE119383 [<https://www.ncbi.nlm.nih.gov/geo/query/acc.cgi?acc=GSE119383>]  
636 accession codes.

637

638

639

### 640 **COMPETING INTERESTS**

641 The authors declare no competing interests.

642

### 643 **ACKNOWLEDGEMENTS**

644 We thank Riccardo Aiese Cigliano (Sequentia Biotech) for help with microarray  
645 analysis, Tony Ferrar for critical manuscript revision and language editing  
646 (<http://www.theeditorsite.com>) and Olga Moreno Pradas for graphic design  
647 support. We acknowledge financial support from the Spanish Ministry of  
648 Economy and Competitiveness, through the “Severo Ochoa Programme for  
649 Centres of Excellence in R&D” 2016-2019 (SEV-2015-0533)”, the CERCA

650 Programme from the Generalitat de Catalunya, and the Agència de Gestió  
651 d'Ajuts Universitaris i de Recerca (2014 SGR 1406). N.F. was funded by  
652 Fundación Renta Corporación, by EMBO short-term postdoctoral fellowship  
653 (ASTF 422-2015) and by BIO2013-43873; F.L.E was funded by BIO2013-43873  
654 and BIO2016-78150-P; and D.B. was funded by BIO2013-43873 and ERC-  
655 2015-CoG-GA 683163. CMA, AA and FPA acknowledge financial support from  
656 the Spanish MINECO-FEDER (project AGL2014-59728-R) and from the  
657 European Union's Seventh Framework Programme for research technological  
658 development and demonstration under grant agreement no. 289365 (project  
659 ROOTOPOWER). S.O. was supported by Ministry of Science and Innovation  
660 and University of Malaga (Spain) through the grant Ramón y Cajal program  
661 (Sonia Osorio, RYC-09170). M.B was funded by BES-2012-053274 and J.L.R  
662 laboratory is supported by grant BFU2014-58289-P from the Spanish Ministry of  
663 Economy and Competitiveness. A.I.C.-D. – A.C. collaboration was funded by  
664 the European Regional Development Funds and Marie Curie IRSES Project  
665 DEANN (PIRSES-GA-2013-612583). A.I.C.-D. is a recipient of BIO2013-43873  
666 and BIO2016-78150-P grants from the Spanish Ministry of Economy and  
667 Competitiveness. A.I.C.-D. is recipient of an ERC Consolidator Grant; this  
668 project has received funding from the European Research Council (ERC) under  
669 the European Union's Horizon 2020 research and innovation program (grant  
670 agreement No 683163).

671

## 672 **AUTHOR CONTRIBUTIONS**

673 A.I.C.-D. conceived, designed and supervised the study. N.F., F.L.E, D.B.,  
674 C.M.A. and F.P.A. performed the genetics and stress phenomic experiments

675 and data analyses. N.F., F.L.E., M.B., J.L.R. and A.I.C.-D. designed the  
676 genome-wide experiments. N.F., F.L.E., A.C. and A.I.C.-D. performed the  
677 genome-wide experiments and data analysis. N.F., F.L.E., T.T., S.O., and  
678 A.R.F. carried out the metabolic profiling and data analysis. A.A. performed the  
679 hormone profiling experiments. T.N. and T.Y. carried the CS and BL  
680 quantification assays. N.F., F.L.E and A.I.C.-D. wrote the manuscript. All  
681 authors discussed the results and the manuscript.

682

683

684

685

686

687

688

689

690

691

692

693

694

695

696

697

698

699

700

701

702

703

704

705

706

707

708

709

710

711

712

713

714

715

716

717

718

719

720

721 **REFERENCES**

- 722 1 Boyer, J. S. Plant productivity and environment. *Science* **218**, 443-448,  
723 doi:10.1126/science.218.4571.443 (1982).

- 724 2 Todaka, D., Shinozaki, K. & Yamaguchi-Shinozaki, K. Recent advances  
725 in the dissection of drought-stress regulatory networks and strategies for  
726 development of drought-tolerant transgenic rice plants. *Front Plant Sci* **6**,  
727 84, doi:10.3389/fpls.2015.00084 (2015).
- 728 3 Yoshida, T., Mogami, J. & Yamaguchi-Shinozaki, K. ABA-dependent and  
729 ABA-independent signaling in response to osmotic stress in plants. *Curr*  
730 *Opin Plant Biol* **21**, 133-139, doi:10.1016/j.pbi.2014.07.009 (2014).
- 731 4 Graether, S. P. & Boddington, K. F. Disorder and function: a review of  
732 the dehydrin protein family. *Front Plant Sci* **5**, 576,  
733 doi:10.3389/fpls.2014.00576 (2014).
- 734 5 Seki, M., Umezawa, T., Urano, K. & Shinozaki, K. Regulatory metabolic  
735 networks in drought stress responses. *Curr Opin Plant Biol* **10**, 296-302,  
736 doi:10.1016/j.pbi.2007.04.014 (2007).
- 737 6 Shao, H. B., Chu, L. Y., Jaleel, C. A. & Zhao, C. X. Water-deficit stress-  
738 induced anatomical changes in higher plants. *C R Biol* **331**, 215-225,  
739 doi:10.1016/j.crv.2008.01.002 (2008).
- 740 7 Tardieu, F. Any trait or trait-related allele can confer drought tolerance:  
741 just design the right drought scenario. *J Exp Bot* **63**, 25-31,  
742 doi:10.1093/jxb/err269 (2012).
- 743 8 Marshall, A. *et al.* Tackling drought stress: receptor-like kinases present  
744 new approaches. *Plant Cell* **24**, 2262-2278, doi:10.1105/tpc.112.096677  
745 (2012).
- 746 9 Smakowska-Luzan, E. *et al.* An extracellular network of Arabidopsis  
747 leucine-rich repeat receptor kinases. *Nature* **553**, 342-346,  
748 doi:10.1038/nature25184 (2018).

- 749 10 Li, J. & Chory, J. A putative leucine-rich repeat receptor kinase involved  
750 in brassinosteroid signal transduction. *Cell* **90**, 929-938 (1997).
- 751 11 Wang, Z. Y., Seto, H., Fujioka, S., Yoshida, S. & Chory, J. BRI1 is a  
752 critical component of a plasma-membrane receptor for plant steroids.  
753 *Nature* **410**, 380-383, doi:10.1038/35066597 (2001).
- 754 12 Kinoshita, T. *et al.* Binding of brassinosteroids to the extracellular domain  
755 of plant receptor kinase BRI1. *Nature* **433**, 167-171,  
756 doi:10.1038/nature03227 (2005).
- 757 13 Hothorn, M. *et al.* Structural basis of steroid hormone perception by the  
758 receptor kinase BRI1. *Nature* **474**, 467-471, doi:10.1038/nature10153  
759 (2011).
- 760 14 She, J. *et al.* Structural insight into brassinosteroid perception by BRI1.  
761 *Nature* **474**, 472-476, doi:10.1038/nature10178 (2011).
- 762 15 Karlova, R. *et al.* The Arabidopsis SOMATIC EMBRYOGENESIS  
763 RECEPTOR-LIKE KINASE1 protein complex includes  
764 BRASSINOSTEROID-INSENSITIVE1. *Plant Cell* **18**, 626-638,  
765 doi:10.1105/tpc.105.039412 (2006).
- 766 16 Li, J. *et al.* BAK1, an Arabidopsis LRR receptor-like protein kinase,  
767 interacts with BRI1 and modulates brassinosteroid signaling. *Cell* **110**,  
768 213-222 (2002).
- 769 17 Nam, K. H. & Li, J. BRI1/BAK1, a receptor kinase pair mediating  
770 brassinosteroid signaling. *Cell* **110**, 203-212 (2002).
- 771 18 Gou, X. *et al.* Genetic evidence for an indispensable role of somatic  
772 embryogenesis receptor kinases in brassinosteroid signaling. *PLoS*  
773 *Genet* **8**, e1002452, doi:10.1371/journal.pgen.1002452 (2012).

- 774 19 Yin, Y. *et al.* BES1 accumulates in the nucleus in response to  
775 brassinosteroids to regulate gene expression and promote stem  
776 elongation. *Cell* **109**, 181-191 (2002).
- 777 20 Wang, Z. Y. *et al.* Nuclear-localized BZR1 mediates brassinosteroid-  
778 induced growth and feedback suppression of brassinosteroid  
779 biosynthesis. *Dev Cell* **2**, 505-513 (2002).
- 780 21 He, J. X., Gendron, J. M., Yang, Y., Li, J. & Wang, Z. Y. The GSK3-like  
781 kinase BIN2 phosphorylates and destabilizes BZR1, a positive regulator  
782 of the brassinosteroid signaling pathway in Arabidopsis. *Proc Natl Acad  
783 Sci U S A* **99**, 10185-10190, doi:10.1073/pnas.152342599 (2002).
- 784 22 Kagale, S., Divi, U. K., Krochko, J. E., Keller, W. A. & Krishna, P.  
785 Brassinosteroid confers tolerance in Arabidopsis thaliana and Brassica  
786 napus to a range of abiotic stresses. *Planta* **225**, 353-364,  
787 doi:10.1007/s00425-006-0361-6 (2007).
- 788 23 Krishna, P. Brassinosteroid-Mediated Stress Responses. *J Plant Growth  
789 Regul* **22**, 289-297, doi:10.1007/s00344-003-0058-z (2003).
- 790 24 Sahni, S. *et al.* Overexpression of the brassinosteroid biosynthetic gene  
791 DWF4 in Brassica napus simultaneously increases seed yield and stress  
792 tolerance. *Sci Rep* **6**, 28298, doi:10.1038/srep28298 (2016).
- 793 25 Feng, Y., Yin, Y. & Fei, S. Down-regulation of BdBRI1, a putative  
794 brassinosteroid receptor gene produces a dwarf phenotype with  
795 enhanced drought tolerance in Brachypodium distachyon. *Plant Sci* **234**,  
796 163-173, doi:10.1016/j.plantsci.2015.02.015 (2015).



- 797 26 Ye, H. *et al.* RD26 mediates crosstalk between drought and  
798 brassinosteroid signalling pathways. *Nat Commun* **8**, 14573, doi:10.1038/  
799 ncomms14573 (2017).
- 800 27 Zhang, S., Cai, Z. & Wang, X. The primary signaling outputs of  
801 brassinosteroids are regulated by abscisic acid signaling. *Proc Natl Acad*  
802 *Sci U S A* **106**, 4543-4548, doi:10.1073/pnas.0900349106 (2009).
- 803 28 Gui, J. *et al.* OsREM4.1 Interacts with OsSERK1 to Coordinate the  
804 Interlinking between Abscisic Acid and Brassinosteroid Signaling in Rice.  
805 *Dev Cell* **38**, 201-213, doi:10.1016/j.devcel.2016.06.011 (2016).
- 806 29 Huang, D., Wu, W., Abrams, S. R. & Cutler, A. J. The relationship of  
807 drought-related gene expression in *Arabidopsis thaliana* to hormonal and  
808 environmental factors. *J Exp Bot* **59**, 2991-3007, doi:10.1093/jxb/ern155  
809 (2008).
- 810 30 Chung, Y., Kwon, S. I. & Choe, S. Antagonistic regulation of *Arabidopsis*  
811 growth by brassinosteroids and abiotic stresses. *Mol Cells* **37**, 795-803,  
812 doi:10.14348/molcells.2014.0127 (2014).
- 813 31 Vilarrasa-Blasi, J. *et al.* Regulation of plant stem cell quiescence by a  
814 brassinosteroid signaling module. *Dev Cell* **30**, 36-47,  
815 doi:10.1016/j.devcel.2014.05.020 (2014).
- 816 32 Fàbregas, N. & Caño-Delgado, A. I. Turning on the microscope turret: a  
817 new view for the study of brassinosteroid signaling in plant development.  
818 *Physiol Plant* **151**, 172-183, doi:10.1111/ppl.12130 (2014).
- 819 33 Fàbregas, N. *et al.* The brassinosteroid insensitive1-like3 signalosome  
820 complex regulates *Arabidopsis* root development. *Plant Cell* **25**, 3377-  
821 3388, doi:10.1105/tpc.113.114462 (2013).

- 822 34 Lozano-Elena, F., Planas-Riverola, A., Vilarrasa-Blasi, J., Schwab, R. &  
823 Cano-Delgado, A. I. Paracrine brassinosteroid signaling at the stem cell  
824 niche controls cellular regeneration. *J Cell Sci* **131**, jcs204065  
825 doi:10.1242/jcs.204065 (2018).
- 826 35 Friedrichsen, D. M., Joazeiro, C. A., Li, J., Hunter, T. & Chory, J.  
827 Brassinosteroid-insensitive-1 is a ubiquitously expressed leucine-rich  
828 repeat receptor serine/threonine kinase. *Plant Physiol* **123**, 1247-1256  
829 (2000).
- 830 36 Caño-Delgado, A. *et al.* BRL1 and BRL3 are novel brassinosteroid  
831 receptors that function in vascular differentiation in Arabidopsis.  
832 *Development* **131**, 5341-5351, doi:10.1242/dev.01403 (2004).
- 833 37 Belkhadir, Y. & Jaillais, Y. The molecular circuitry of brassinosteroid  
834 signaling. *New Phytol* **206**, 522-540, doi:10.1111/nph.13269 (2015).
- 835 38 Eremina, M. *et al.* Brassinosteroids participate in the control of basal and  
836 acquired freezing tolerance of plants. *Proc Natl Acad Sci U S A* **113**,  
837 E5982-E5991, doi:10.1073/pnas.1611477113 (2016).
- 838 39 Vragovic, K. *et al.* Translatome analyses capture of opposing tissue-  
839 specific brassinosteroid signals orchestrating root meristem  
840 differentiation. *Proc Natl Acad Sci U S A* **112**, 923-928,  
841 doi:10.1073/pnas.1417947112 (2015).
- 842 40 González-García, M. P. *et al.* Brassinosteroids control meristem size by  
843 promoting cell cycle progression in Arabidopsis roots. *Development* **138**,  
844 849-859, doi:10.1242/dev.057331 (2011).

- 845 41 Hacham, Y. *et al.* Brassinosteroid perception in the epidermis controls  
846 root meristem size. *Development* **138**, 839-848, doi:10.1242/dev.061804  
847 (2011).
- 848 42 Duan, Y. *et al.* An endoplasmic reticulum response pathway mediates  
849 programmed cell death of root tip induced by water stress in Arabidopsis.  
850 *New Phytol* **186**, 681-695, doi:10.1111/j.1469-8137.2010.03207.x (2010).
- 851 43 Takahashi, N., Goto, N., Okada, K. & Takahashi, H. Hydrotropism in  
852 abscisic acid, wavy, and gravitropic mutants of Arabidopsis thaliana.  
853 *Planta* **216**, 203-211, doi:10.1007/s00425-002-0840-3 (2002).
- 854 44 Asami, T. *et al.* Characterization of brassinazole, a triazole-type  
855 brassinosteroid biosynthesis inhibitor. *Plant Physiol* **123**, 93-100 (2000).
- 856 45 Singh, T. N., Aspinall, D. & Paleg, L. G. Proline accumulation and varietal  
857 adaptability to drought in barley: a potential metabolic measure of  
858 drought resistance. *Nat New Biol* **236**, 188-190 (1972).
- 859 46 Szabados, L. & Savoure, A. Proline: a multifunctional amino acid. *Trends*  
860 *Plant Sci* **15**, 89-97, doi:10.1016/j.tplants.2009.11.009 (2010).
- 861 47 Durand, M. *et al.* Water Deficit Enhances C Export to the Roots in  
862 Arabidopsis thaliana Plants with Contribution of Sucrose Transporters in  
863 Both Shoot and Roots. *Plant Physiol* **170**, 1460-1479,  
864 doi:10.1104/pp.15.01926 (2016).
- 865 48 Conrath, U., Pieterse, C. M. & Mauch-Mani, B. Priming in plant-pathogen  
866 interactions. *Trends Plant Sci* **7**, 210-216 (2002).
- 867 49 Brady, S. M. *et al.* A high-resolution root spatiotemporal map reveals  
868 dominant expression patterns. *Science* **318**, 801-806,  
869 doi:10.1126/science.1146265 (2007).

- 870 50 García-Alcalde, F., García-López, F., Dopazo, J. & Conesa, A.  
871 Paintomics: a web based tool for the joint visualization of transcriptomics  
872 and metabolomics data. *Bioinformatics* **27**, 137-139,  
873 doi:10.1093/bioinformatics/btq594 (2011).
- 874 51 Shakirova, F. *et al.* Involvement of dehydrins in 24-epibrassinolide-  
875 induced protection of wheat plants against drought stress. *Plant*  
876 *Physiology and Biochemistry* **108**, 539-548,  
877 doi:10.1016/j.plaphy.2016.07.013 (2016).
- 878 52 Chen, J. *et al.* Arabidopsis WRKY46, WRKY54, and WRKY70  
879 Transcription Factors Are Involved in Brassinosteroid-Regulated Plant  
880 Growth and Drought Responses. *The Plant Cell* **29**, 1425 (2017).
- 881 53 Iwata, S., Miyazawa, Y., Fujii, N. & Takahashi, H. MIZ1-regulated  
882 hydrotropism functions in the growth and survival of Arabidopsis thaliana  
883 under natural conditions. *Ann Bot* **112**, 103-114, doi:10.1093/aob/mct098  
884 (2013).
- 885 54 Ge, L.-F. *et al.* Overexpression of the trehalose-6-phosphate  
886 phosphatase gene OsTPP1 confers stress tolerance in rice and results in  
887 the activation of stress responsive genes. *Planta* **228**, 191-201,  
888 doi:10.1007/s00425-008-0729-x (2008).
- 889 55 Nuccio, M. L. *et al.* Expression of trehalose-6-phosphate phosphatase in  
890 maize ears improves yield in well-watered and drought conditions.  
891 *Nature Biotechnology* **33**, 862, doi:10.1038/nbt.3277 (2015).
- 892 56 Himuro, Y. *et al.* Arabidopsis galactinol synthase AtGolS2 improves  
893 drought tolerance in the monocot model Brachypodium distachyon.

- 894 *Journal of Plant Physiology* **171**, 1127-1131,  
895 doi:10.1016/j.jplph.2014.04.007 (2014).  
896
- 897 57 Nanjo, T. *et al.* Antisense suppression of proline degradation improves  
898 tolerance to freezing and salinity in *Arabidopsis thaliana*. *FEBS Letters*  
899 **461**, 205-210, doi:10.1016/S0014-5793(99)01451-9 (1999).
- 900 58 Wu, C. Y. *et al.* Brassinosteroids regulate grain filling in rice. *Plant Cell*  
901 **20**, 2130-2145, doi:10.1105/tpc.107.055087 (2008).
- 902 59 Xu, F., Xi, Z.-m., Zhang, H., Zhang, C.-j. & Zhang, Z.-w. Brassinosteroids  
903 are involved in controlling sugar unloading in *Vitis vinifera* 'Cabernet  
904 Sauvignon' berries during véraison. *Plant Physiology and Biochemistry*  
905 **94**, 197-208, doi:[10.1016/j.plaphy.2015.06.005](https://doi.org/10.1016/j.plaphy.2015.06.005) (2015).
- 906 60 Krasensky, J. & Jonak, C. Drought, salt, and temperature stress-induced  
907 metabolic rearrangements and regulatory networks. *J Exp Bot* **63**, 1593-  
908 1608, doi:10.1093/jxb/err460 (2012).
- 909 61 Urano, K. *et al.* Characterization of the ABA-regulated global responses  
910 to dehydration in *Arabidopsis* by metabolomics. *Plant J* **57**, 1065-1078,  
911 doi:10.1111/j.1365-313X.2008.03748.x (2009).
- 912 62 Ding, Y., Fromm, M. & Avramova, Z. Multiple exposures to drought 'train'  
913 transcriptional responses in *Arabidopsis*. *Nat Commun* **3**, 740,  
914 doi:10.1038/ncomms1732 (2012).
- 915 63 Nishizawa, A., Yabuta, Y. & Shigeoka, S. Galactinol and raffinose  
916 constitute a novel function to protect plants from oxidative damage. *Plant*  
917 *Physiol* **147**, 1251-1263, doi:10.1104/pp.108.122465 (2008).

- 918 64 Aljanabi, S. M. & Martinez, I. Universal and rapid salt-extraction of high  
919 quality genomic DNA for PCR-based techniques. *Nucleic Acids Res* **25**,  
920 4692-4693 (1997).
- 921 65 Betegón-Putze, I., González, A., Sevillano, X., Blasco-Escámez, D. &  
922 Caño-Delgado, A. I. . MyROOT: A novel method and software for the  
923 semi-automatic measurement of plant root length. Preprint at *bioRxiv*  
924 doi:[10.1101/309773](https://doi.org/10.1101/309773) (2018).
- 925
- 926 66 Lisec, J., Schauer, N., Kopka, J., Willmitzer, L. & Fernie, A. R. Gas  
927 chromatography mass spectrometry-based metabolite profiling in plants.  
928 *Nat Protoc* **1**, 387-396, doi:10.1038/nprot.2006.59 (2006).
- 929 67 Kopka, J. *et al.* GMD@CSB.DB: the Golm Metabolome Database.  
930 *Bioinformatics* **21**, 1635-1638, doi:10.1093/bioinformatics/bti236 (2005).
- 931 68 Luedemann, A., Strassburg, K., Erban, A. & Kopka, J. TagFinder for the  
932 quantitative analysis of gas chromatography--mass spectrometry (GC-  
933 MS)-based metabolite profiling experiments. *Bioinformatics* **24**, 732-737,  
934 doi:10.1093/bioinformatics/btn023 (2008).
- 935 69 Conesa, A., Nueda, M. J., Ferrer, A. & Talon, M. maSigPro: a method to  
936 identify significantly differential expression profiles in time-course  
937 microarray experiments. *Bioinformatics* **22**, 1096-1102,  
938 doi:10.1093/bioinformatics/btl056 (2006).
- 939 70 Ritchie, M. E. *et al.* limma powers differential expression analyses for  
940 RNA-sequencing and microarray studies. *Nucleic Acids Res* **43**, e47,  
941 doi:10.1093/nar/gkv007 (2015).
- 942

943

## 944 **FIGURE LEGENDS**

### 945 **Figure 1. BR perception mutant roots are less sensitive to osmotic stress.**

946 (a) Seven-day-old roots of WT, BR mutants *bak1*, *brl1brl3*, *brl1brl3bak1*, *bri1*,  
947 *bri1brl1brl3*, and *bri1brl1brl3bak1* (*quad*), and BR overexpressor line  
948 *35S:BRL3-GFP* (*BRL3ox*) grown in control (-) or 270 mM sorbitol (+) conditions.

949 Scale bar: 0.5 cm. (b) Boxplots depict the distribution of seven-day-old root  
950 lengths in control (dark green) or sorbitol (light green) conditions. Red line  
951 depicts relative root growth inhibition upon stress (ratio sorbitol/control +/-  
952 s.e.m.). Data from five independent biological replicates (n>150). Different

953 letters represent significant differences (p-value<0.05) in an ANOVA plus  
954 Tukey's HSD test. (c) Four-day-old roots stained with propidium iodide (PI, red)  
955 after 24 h in control (top) or sorbitol (bottom) media. Green channel (GFP)  
956 shows the BRL3 membrane protein receptor under the 35SCaMV constitutive  
957 promoter localizing to the vascular tissues in primary roots. Scale bar: 100  $\mu$ m.

958 (d) Quantification of cell death in sorbitol-treated root tips. Boxplots represent  
959 the relative PI staining (sorbitol/control) for each genotype. Averages from five  
960 independent biological replicates (n>31). Different letters represent significant  
961 differences (p-value<0.05) in an ANOVA plus Tukey's HSD test. Boxplots  
962 represent the median and interquartile range (IQR). Whiskers depict Q1-  
963 1.5\*IQR and Q3+1.5\*IQR and points experimental observation.

964

### 965 **Figure 2. Overexpression of the BRL3 receptor promotes root** 966 **hydrotropism.**

967 (a) Root curvature (hydrotropic response) in seven-day-old roots after 24 h of  
968 sorbitol-induced osmotic stress (270 mM). Scale bar: 0.2 cm. (b) Discrete  
969 distribution of root hydrotropic curvature angles in the different genotypes.  
970 Lightest green depicts roots curved between 0° and 10°, light green between  
971 10° and 20°, dark grey between 20° and 30°, and darkest green depicts roots  
972 that have a curvature of more than 30° as indicated in the color legend. (c)  
973 Continuous distribution of root curvature angles. Different letters indicate a  
974 significant difference (p-value<0.05) in a one-way ANOVA test plus Tukey's  
975 HSD test. Boxplot represent the median and interquartile range (IQR). Whiskers  
976 depict Q1-1.5\*IQR and Q3+1.5\*IQR and points experimental observations. Data  
977 from four independent biological replicates (n>50). (d) Stress traits matrix for all  
978 physiological assays performed on the roots and shoots of WT, BR loss-of-  
979 function mutants and *BRL3ox*. Root growth in control conditions is highlighted in  
980 green. Color bar depicts values for scaled data.

981

982 **Figure 3. BRL3 overexpression confers drought tolerance.**

983 (a) From top to bottom, three-week-old plant rosette phenotypes of WT,  
984 *brl1brl3*, *bak1*, *brl1brl3bak1*, *bri1*, *bri1brl1brl3*, *quad* and *BRL3ox* grown in well-  
985 watered conditions (left column), after 12 days of drought stress (middle  
986 column) and after 7 days of re-watering (right column). (b) Plant survival rates  
987 after 7 days of re-watering. Averages of five independent biological replicates  
988 +/- s.e.m. (n>140). Asterisk indicates a significant difference (p-value<0.05) in a  
989 chi-squared test for survival ratios compared to WT. (c) Bar plot shows the days  
990 needed to reach different percentages of the soil field capacity for each  
991 genotype used in the study. (d) Relative water content (RWC) of mature



992 rosettes at 0% (field capacity), 50% and 70% soil water loss. **(e)** Photosynthesis  
993 efficiency ( $\mu\text{mol}/\text{m}^2\cdot\text{s}$ ) at different percentages of soil water loss. **(d, e)** Boxplot  
994 represent the median and interquartile range (IQR). Whiskers depict  $Q1-1.5\cdot\text{IQR}$   
995 and  $Q3+1.5\cdot\text{IQR}$  and points experimental observations ( $n=6$ ). Different  
996 letters depict significant differences within each genotype in a one-way ANOVA  
997 plus a Tukey's HSD test. **(f)** Schematic representation of BR signaling levels,  
998 adult plant size and drought resistance. Loss-of-function mutants passively  
999 avoid stress (drought avoidance), whereas plants with increased levels of BRL3  
1000 act actively to avoid drought stress (drought tolerance).

1001

1002 **Figure 4. BRL3 overexpression plants show a primed metabolic signature.**

1003 **(a)** Metabolites differentially accumulated in *BRL3ox* (dark green) or *quad* (light  
1004 green) shoots relative to WT at basal conditions. **(b)** Metabolites differentially  
1005 accumulated in *BRL3ox* (dark green) or *quad* (light green) roots relative to WT  
1006 at basal conditions. **(a, b)** Boxplot represent the median and interquartile range  
1007 (IQR). Whiskers depict  $Q1-1.5\cdot\text{IQR}$  and  $Q3+1.5\cdot\text{IQR}$  and points experimental  
1008 observations ( $n=5$ ). Asterisks denote statistical differences in a two-tailed t-test  
1009 ( $p\text{-value} < 0.05$ ) for raw data comparisons *BRL3ox* vs. WT (panel right side) or  
1010 *quad* (panel left side). **(c)** Metabolites following differential dynamics between  
1011 *BRL3ox* and WT shoots along the drought time course. **(d)** Metabolites  
1012 following differential dynamics between *BRL3ox* and WT roots along the  
1013 drought time course. **(c, d)** Heatmap represents the  $\log_2$  ratio of *BRL3ox*/WT.  
1014 **(e-j)** Clustering of the dynamics of relative metabolite levels along the drought  
1015 time course in shoots and roots. Solid lines show the actual metabolic profile  
1016 (averages) of the representative metabolite for each cluster while dashed lines

1017 represent the polynomial curve that best fit the profile. Statistical significance  
1018 was evaluated with the maSigPro package. (e) Metabolites following a linear  
1019 increase during drought in shoots include Glucose, Glucose-1P, *myo*-inositol,  
1020 and Sinapate. (f) Proline follows a steeper exponential increase in *BRL3ox*  
1021 shoots. (g) Metabolites following an exponential increase in *BRL3ox* shoots but  
1022 nearly a linear increase in WT include galactose, GABA, phenylalanine,  
1023 tyrosine, 2-methylmalate, lysine, isoleucine, leucine, nicotinate, uracil, and  
1024 tryptophan. (h) Metabolites following a steeper exponential increase in *BRL3ox*  
1025 roots include trehalose, sucrose, proline and raffinose. (i) Metabolites following  
1026 a reduced linear increase until a certain maximum in *BRL3ox* roots include  
1027 glycerate and malate. (j) Metabolites following an exponential increase in  
1028 *BRL3ox* roots but a linear increase in WT include glucose, fructose, *myo*-  
1029 inositol, galactose, and asparagine.

1030

1031 **Figure 5. Stress genes are constitutively activated in *BRL3ox* roots.**

1032 (a) Most representative GO categories enriched in *BRL3ox* roots from the  
1033 upregulated genes at time 0 and after 5 days of drought (b) Deployment of  
1034 genes within “Response to stress” (GO:0006950) term that are also annotated  
1035 as responsive to water, salt, heat, cold, and light stress. Colors in the heatmap  
1036 represent the log<sub>2</sub> fold change of *BRL3ox* vs. WT roots in control conditions (C)  
1037 or the differential drought response ( $\log_2(\text{FC drought}/\text{CTRL in } BRL3ox)$ ) –  
1038 ( $\log_2(\text{FCdrought}/\text{CTRL in WT})$ ) if the gene is affected by the interaction  
1039 genotype\*drought (Int.). Red color in the squared heatmaps on the right shows  
1040 that the gene has been previously identified as a direct target of BES1 or BZR1  
1041 transcription factors. (c) Most representative GO categories enriched in *BRL3ox*

1042 roots from the upregulated genes at time 0 and after 5 days of drought. **(d)** Most  
1043 representative GO categories enriched among genes affected by the interaction  
1044 genotype-drought. GO categories enriched in genes activated in *BRL3ox* under  
1045 drought compared to WT (left column) in genes repressed in *BRL3ox* under  
1046 drought compared to WT (right column). Color bars:  $-\log$  of p-value (adjusted  
1047 by Benjamini-Hochberg or non-adjusted).

1048

1049 **Figure 6. Enrichment of deregulated genes in *BRL3ox* root vasculature.**

1050 **(a)** Tissue enrichment for upregulated (red) or downregulated (blue) genes in  
1051 control conditions. Bars trespassing the p-value threshold (0.05) were  
1052 considered enriched in the dataset. **(b)** Tissue enrichment for genes affected by  
1053 the interaction genotype\*drought Bars trespassing the threshold p-value<0.05  
1054 were considered enriched in the dataset. **(a-b)** Deregulated genes tissue  
1055 enrichment. AGL42: Quiescent center, APL: Phloem + Companion cells,  
1056 COBL9: Root hair cells, CORTEX: Cortex, GL2: Non-hair cells, J2661:  
1057 Pericycle, JO121: Xylem pole pericycle, LRC: Lateral root cap, PET111:  
1058 Columella, RM1000: Lateral root primordia, S17: Phloem pole pericycle, S18:  
1059 Maturing Xylem, S32: Protophloem, S4: Developing xylem, SCR5: Endodermis,  
1060 SUC2: Phloem. y-axes represent the negative logarithm of one-tailed Fisher's  
1061 test. **(c)** Deregulated genes enriched in the Pericycle (J2261 marker). **(d)**  
1062 Deregulated genes enriched in the Phloem Pole Pericycle (S17 marker). **(c,d)**  
1063 Bars represent the log<sub>2</sub> fold-change of *BRL3ox* vs. WT roots in control (black)  
1064 or the difference of drought responses between *BRL3ox* and WT (FC  
1065 drought/CTRL in *BRL3ox* – FC drought/CTRL in WT) in the lineal model (gray).

1066 Blue boxes highlight enzymes directly involved in the metabolism of deregulated  
1067 metabolites.

1068

1069

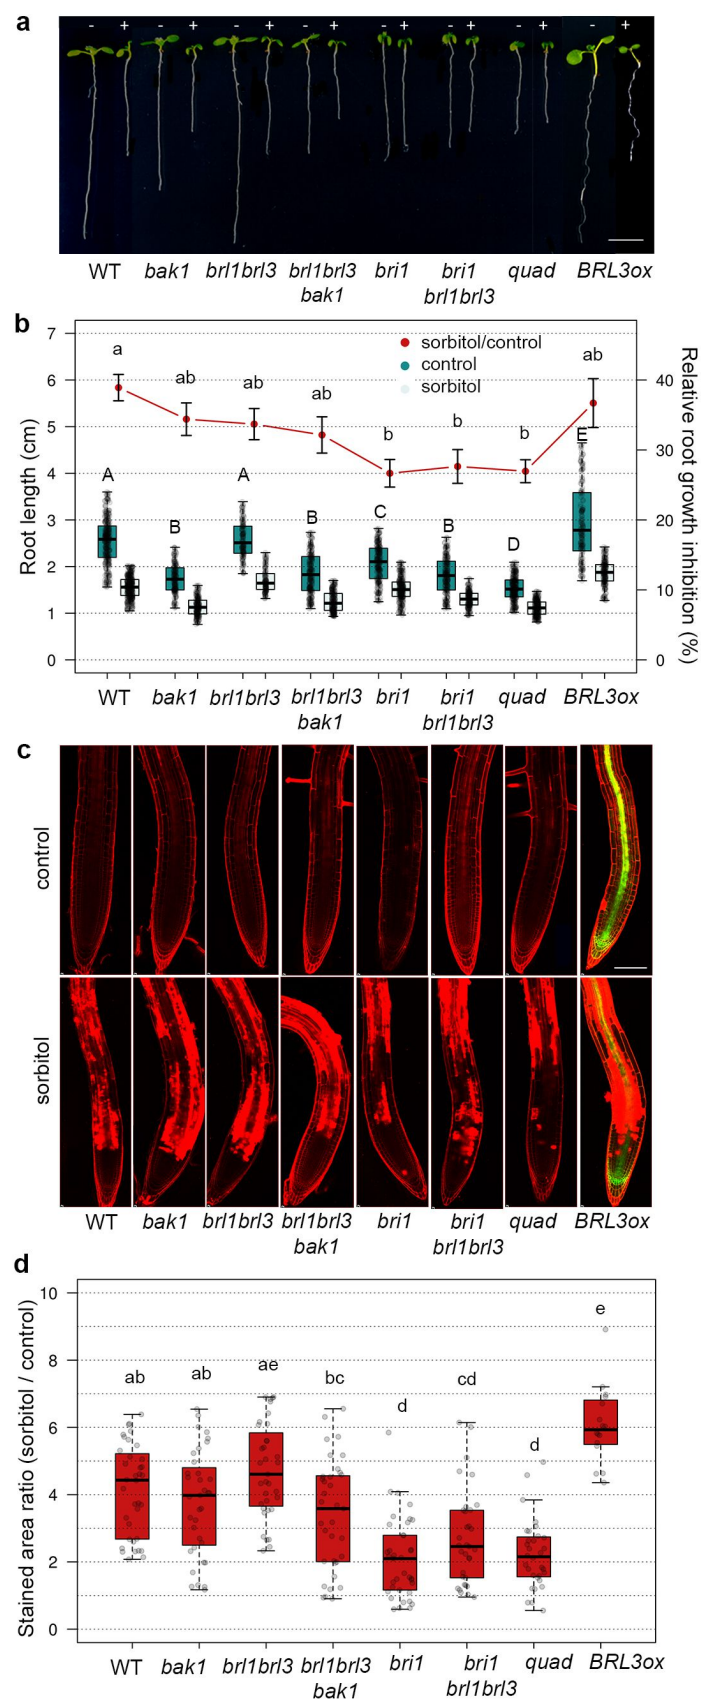

Figure 1. BR perception mutant roots are less sensitive to osmotic stress.

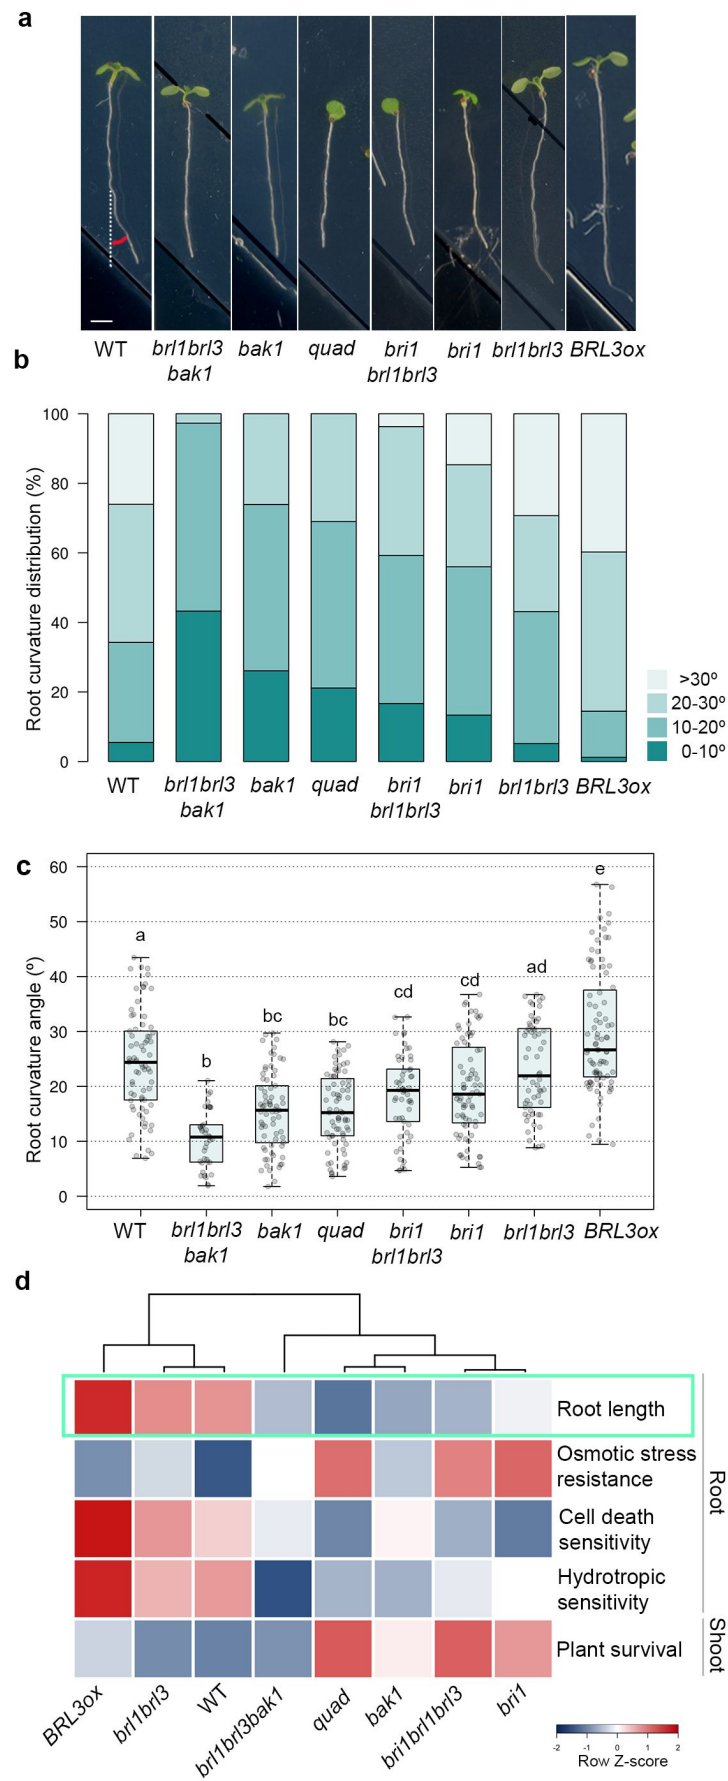

**Figure 2. The BRL3 receptor promotes root hydrotropism responses**



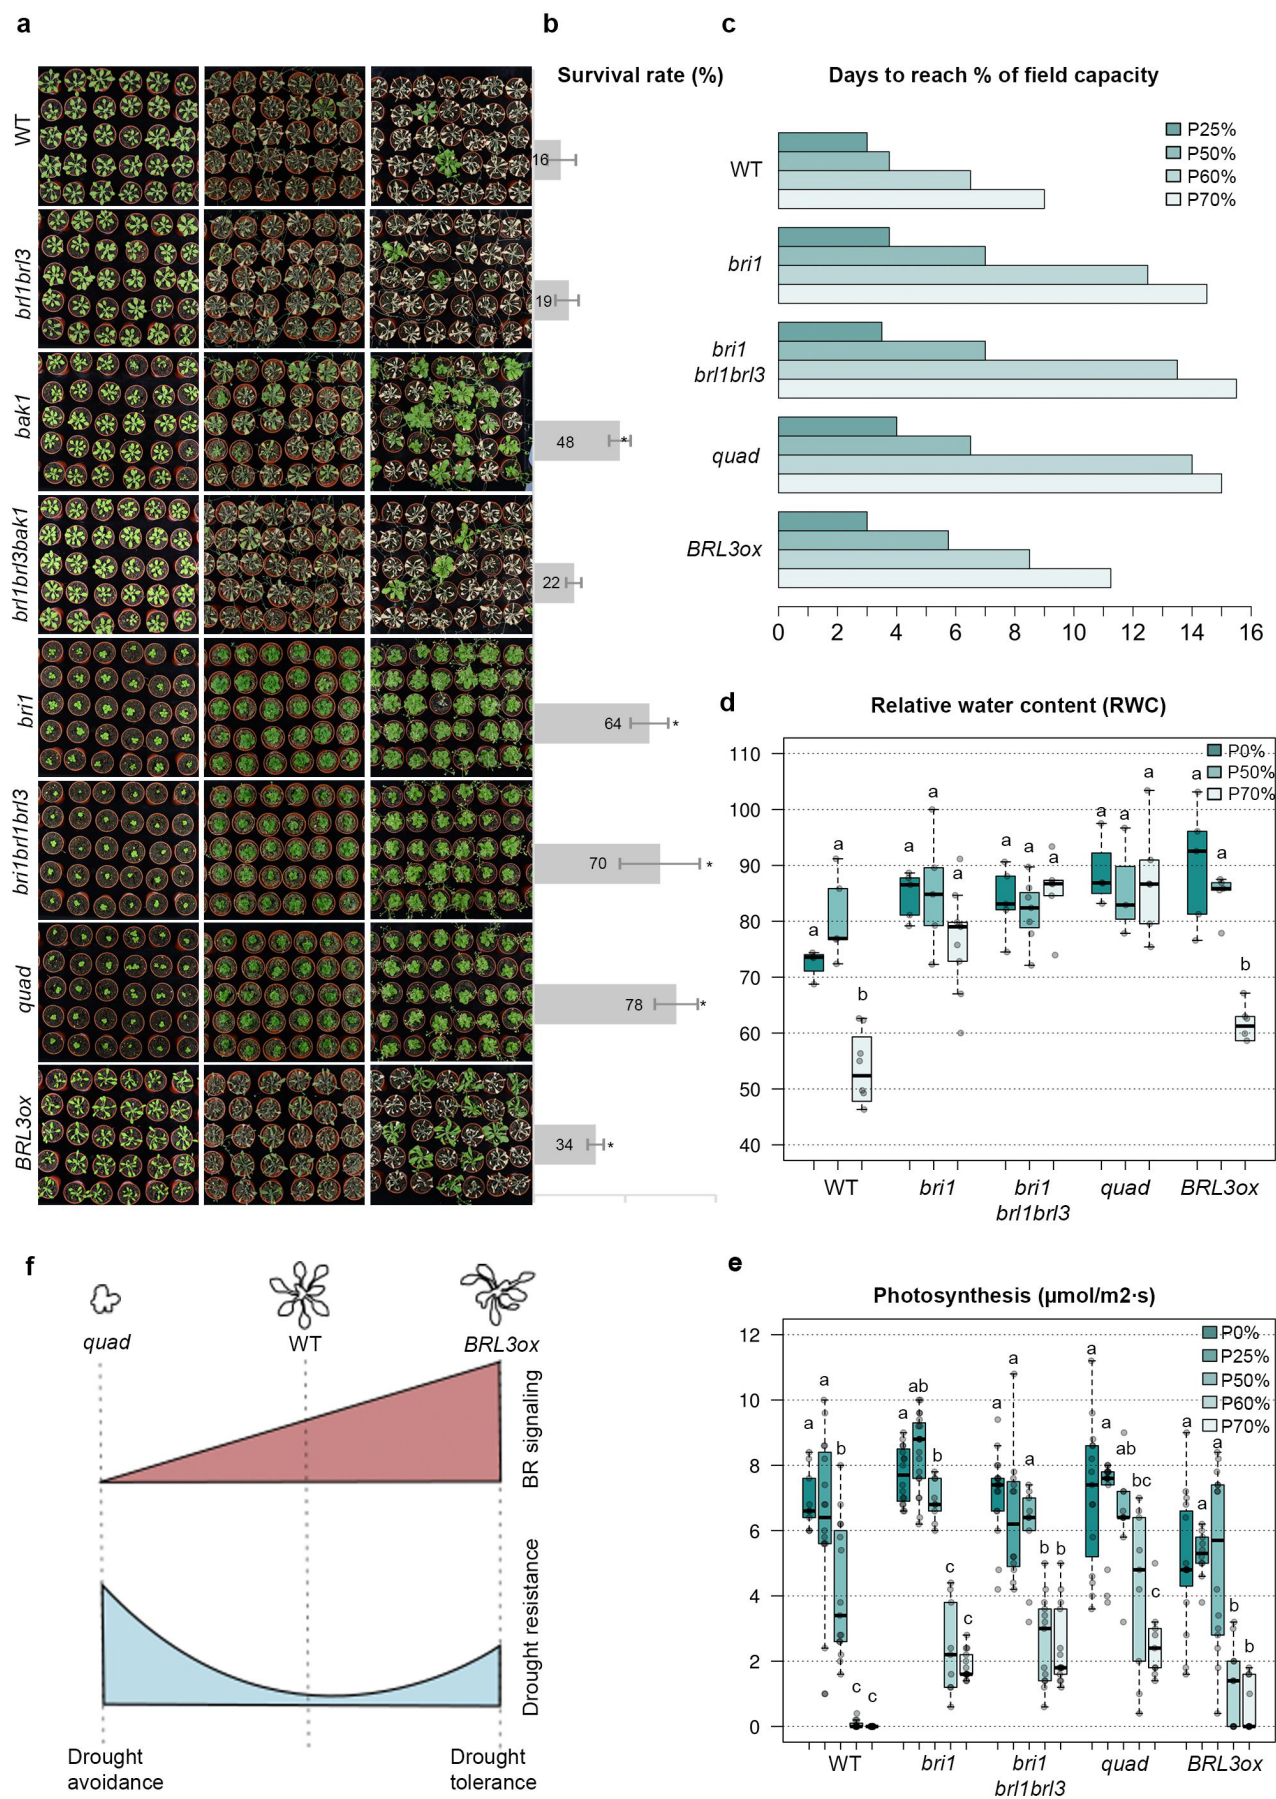

Figure 3. BRL3 overexpression confers drought tolerance.

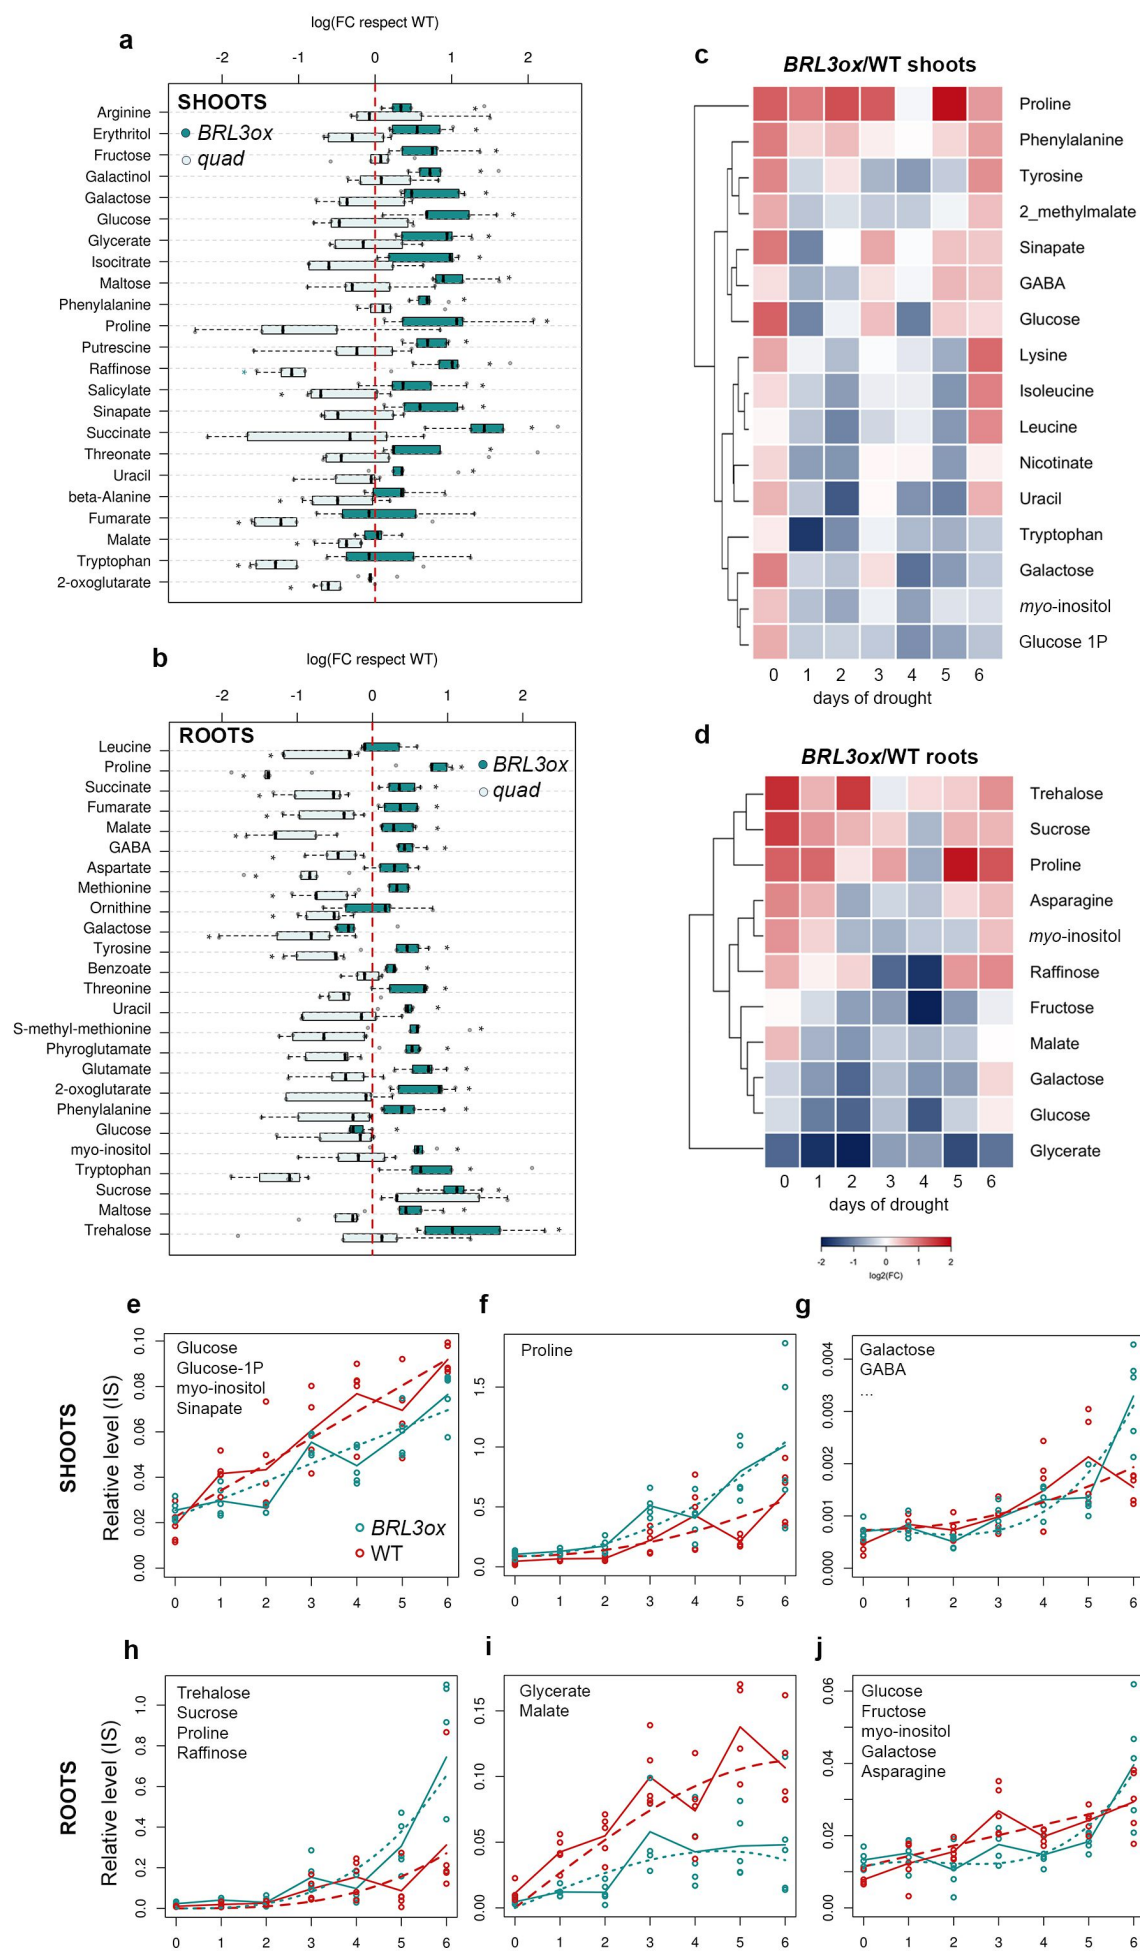

Figure 4. BRL3 overexpression plants show a primed metabolic signature



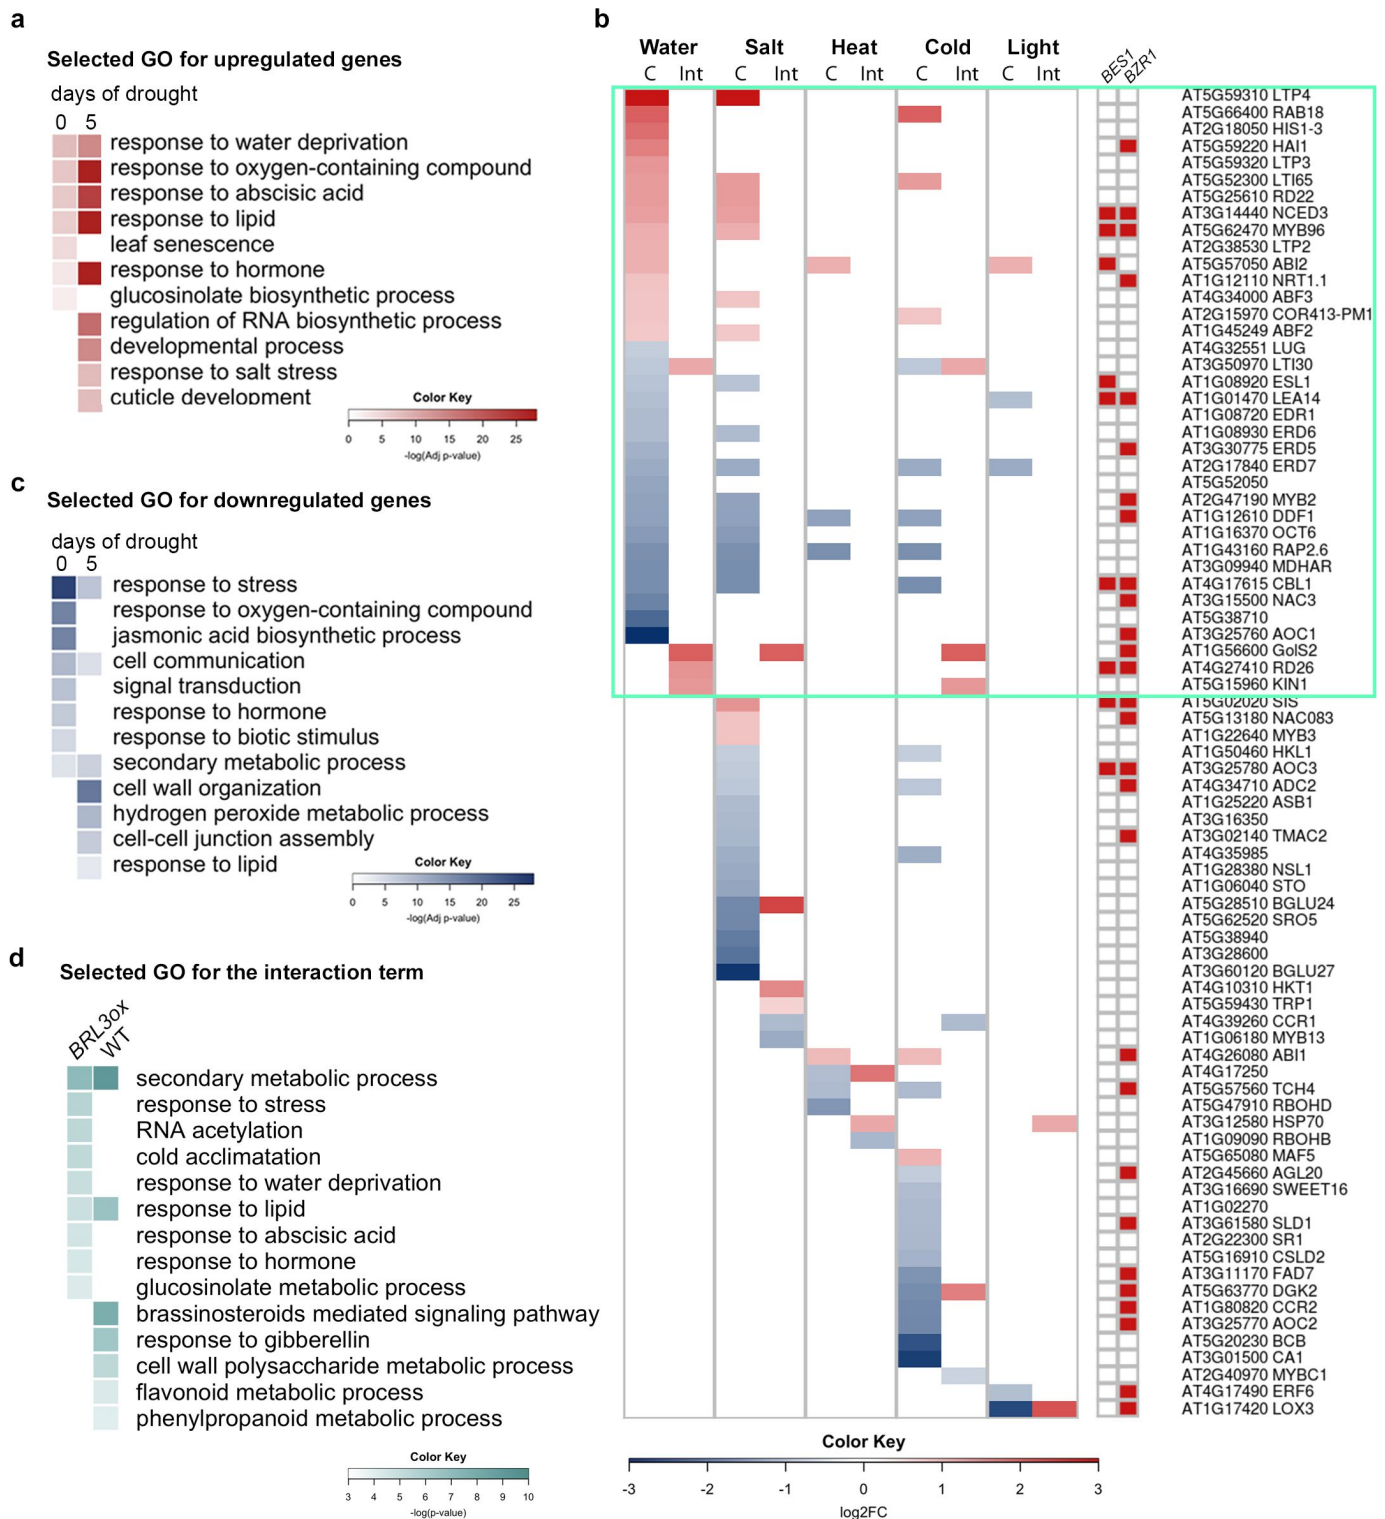

Figure 5. Stress genes are constitutively activated in *BRL3ox* roots.

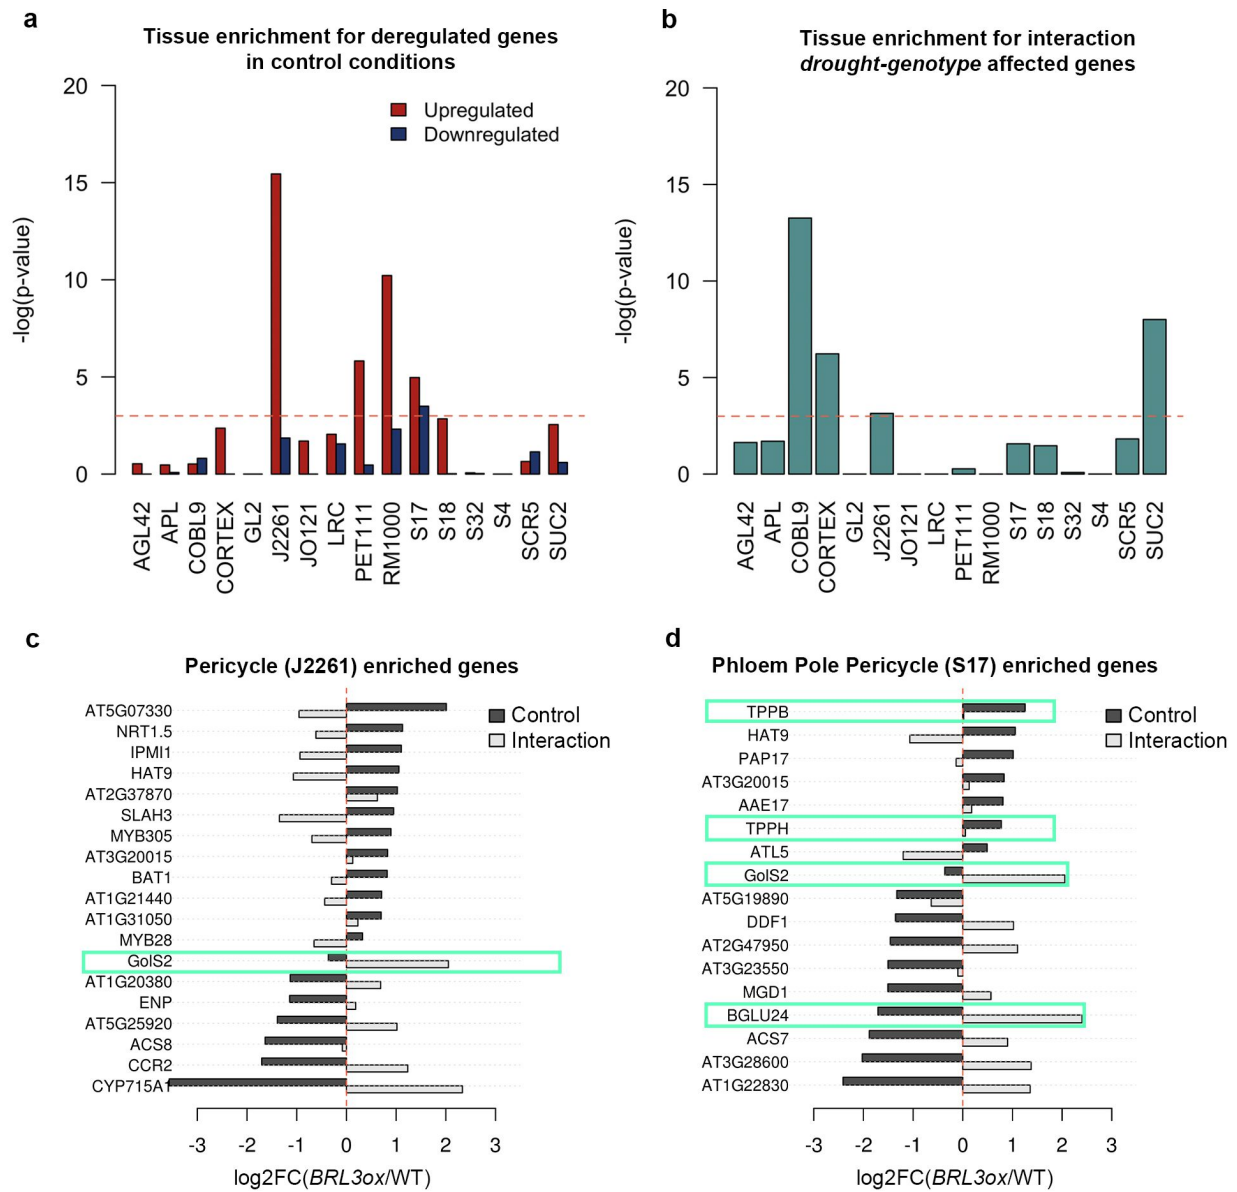

Figure 6. Enrichment of deregulated genes in *BRL3ox* root vasculature.
